# Supplementary material
Source: publisher site journal article supplement (https://www.dovepress.com/article/408254)
Supplement: Supplementary file 1 [file get_supplementary_file.php]

**Appendix 1 : Questionnaire**

**Demographic Details**

This project has been reviewed by Social and Behavioural Research Ethics Committee (SBREC) reviewed (Project Number 8612)

Please answer the below questions after viewing the videos.

WB = Whiteboard Animation; PN = Patient Narratives

1. What year of study are you in?


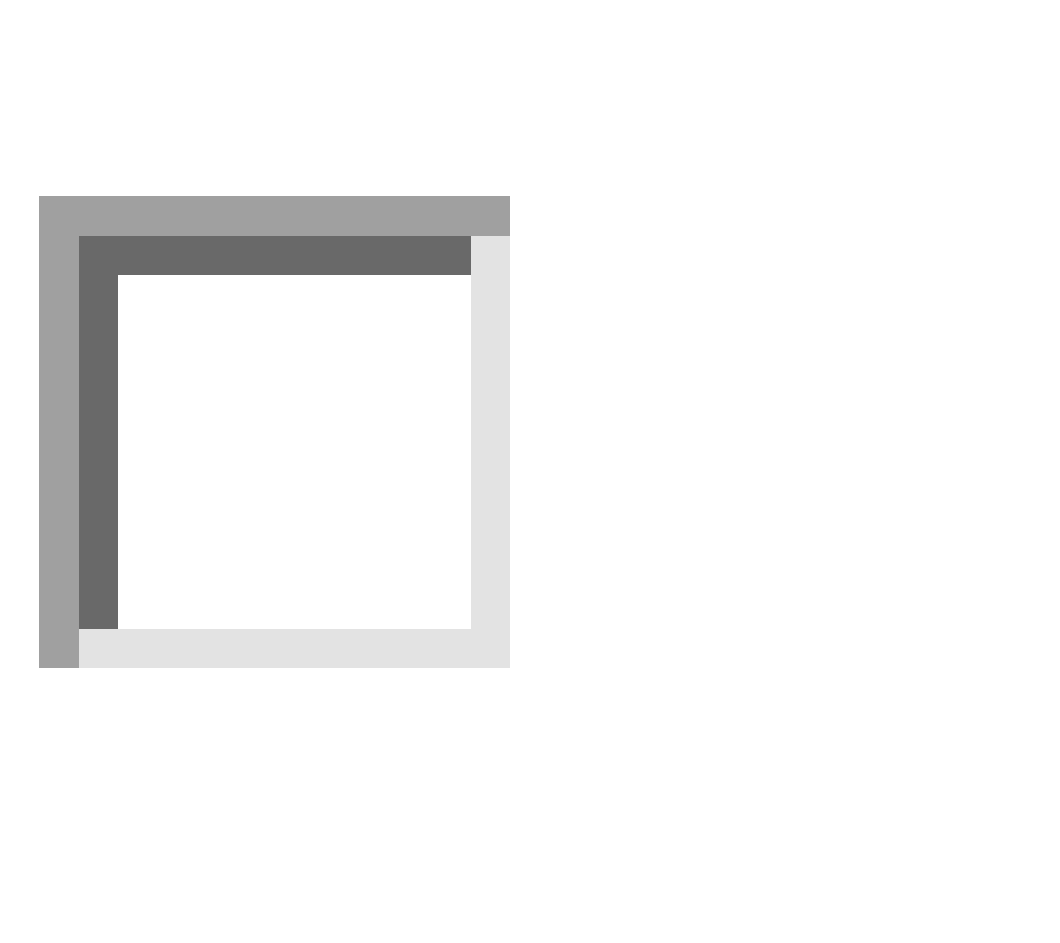
4th


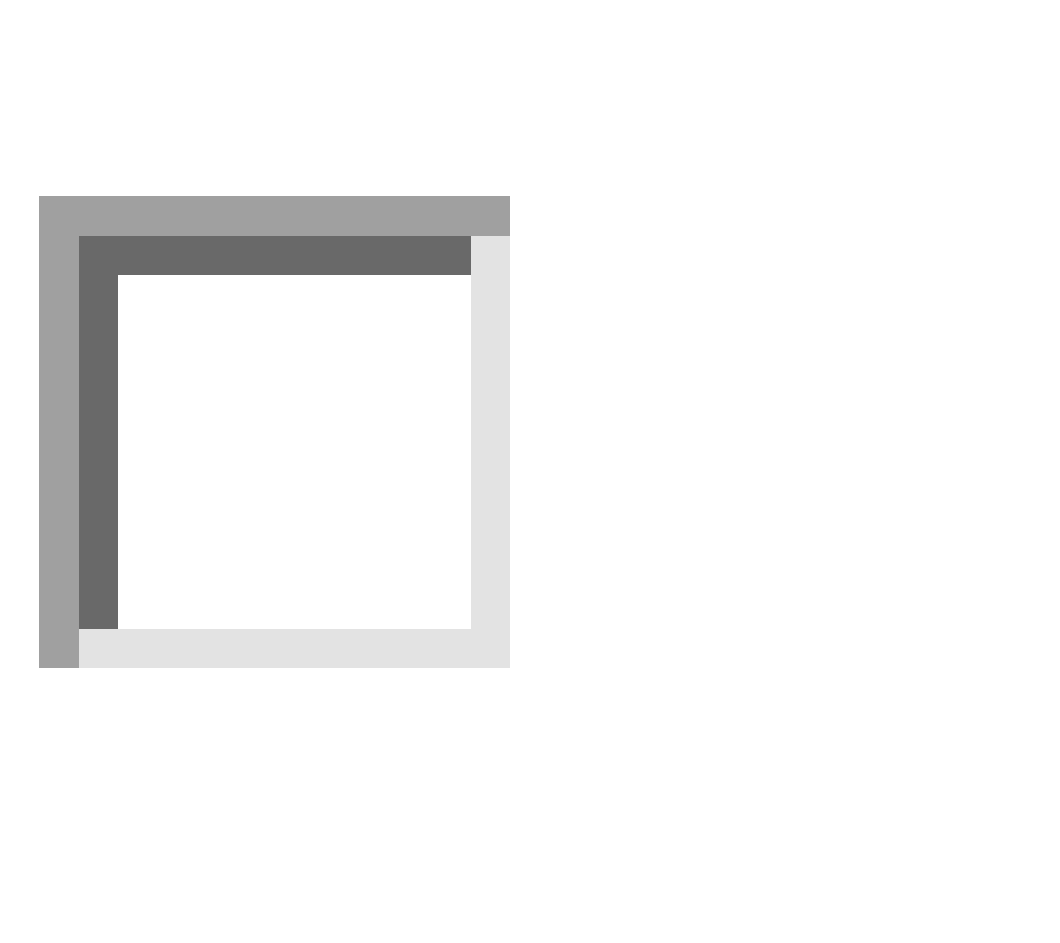
5th


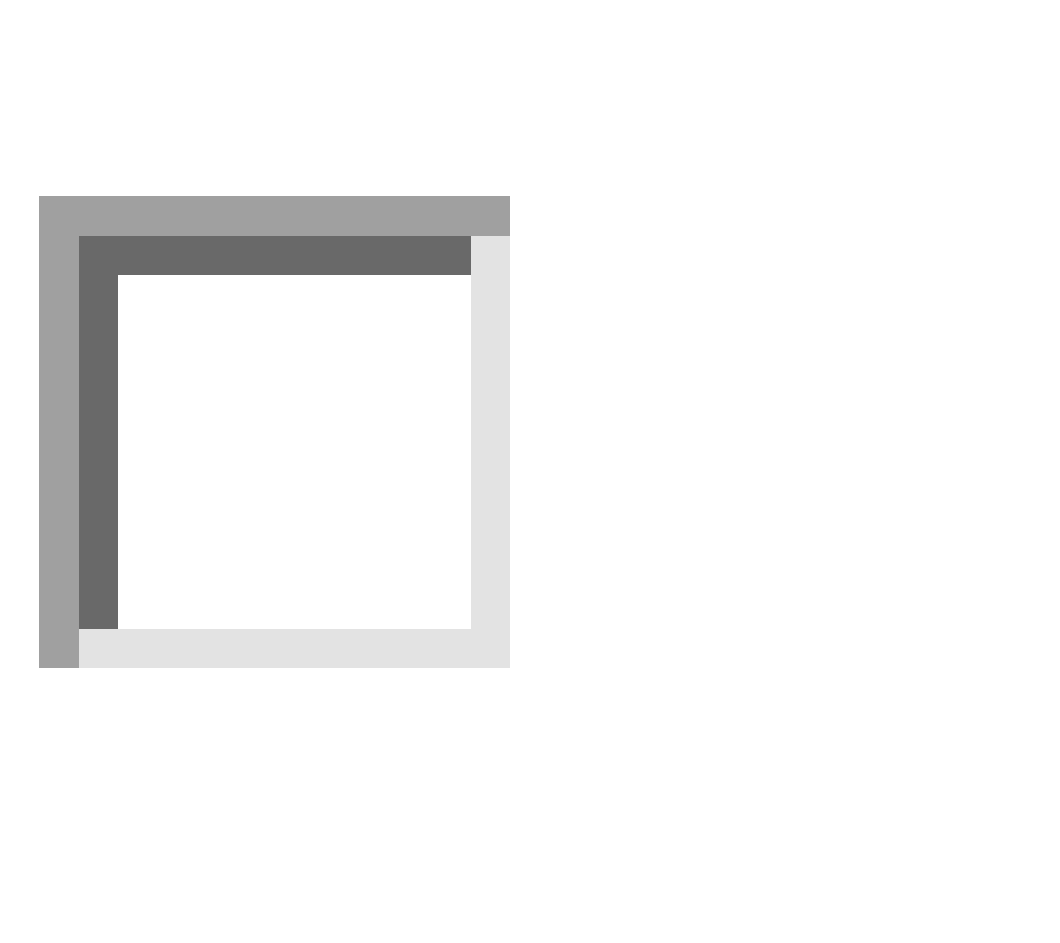
6th

2. Are you undergraduate or postgraduate


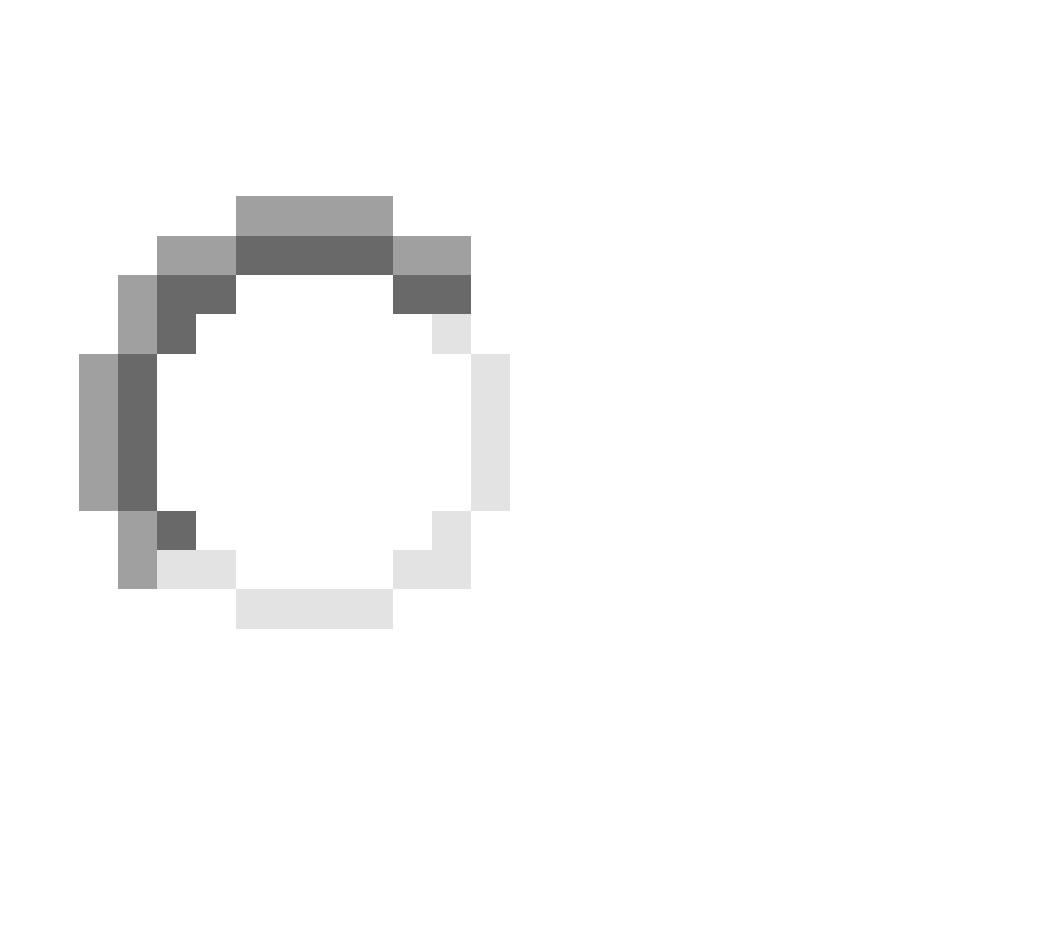
Undergraduate


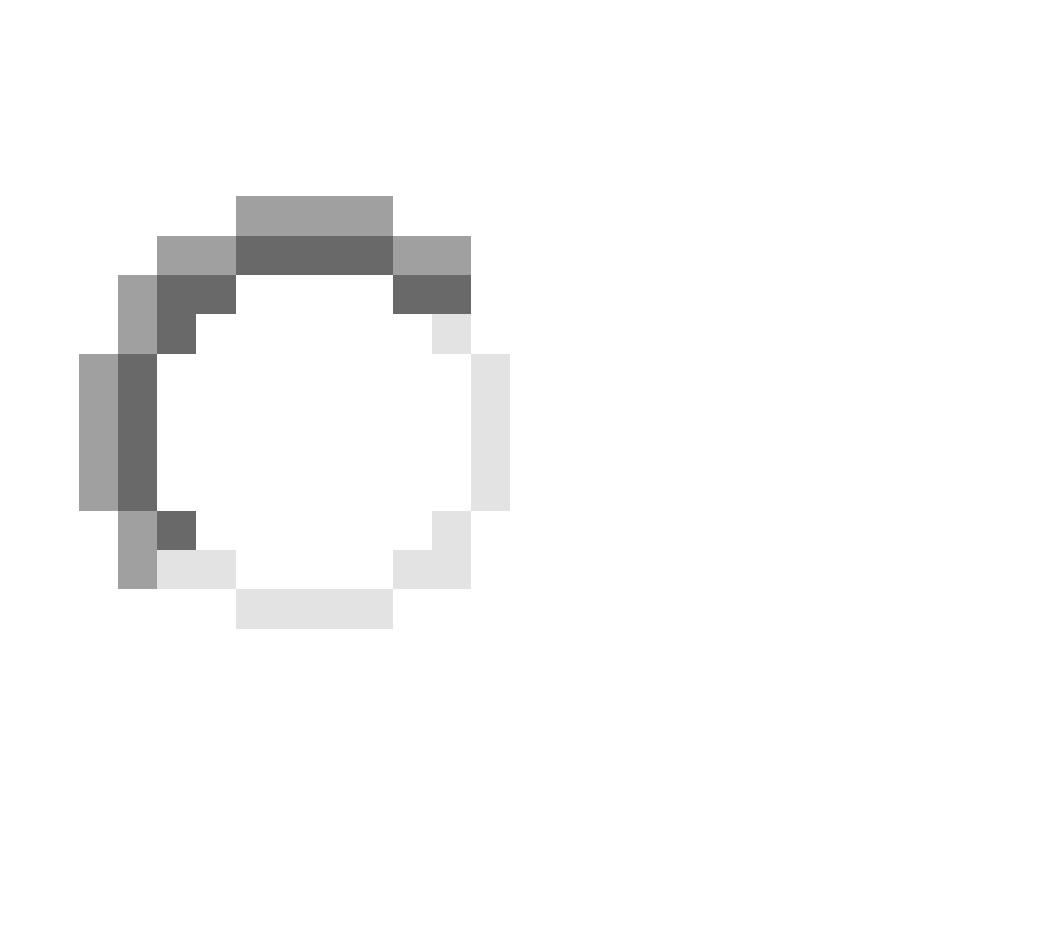
Postgraduate

3. What is your age?


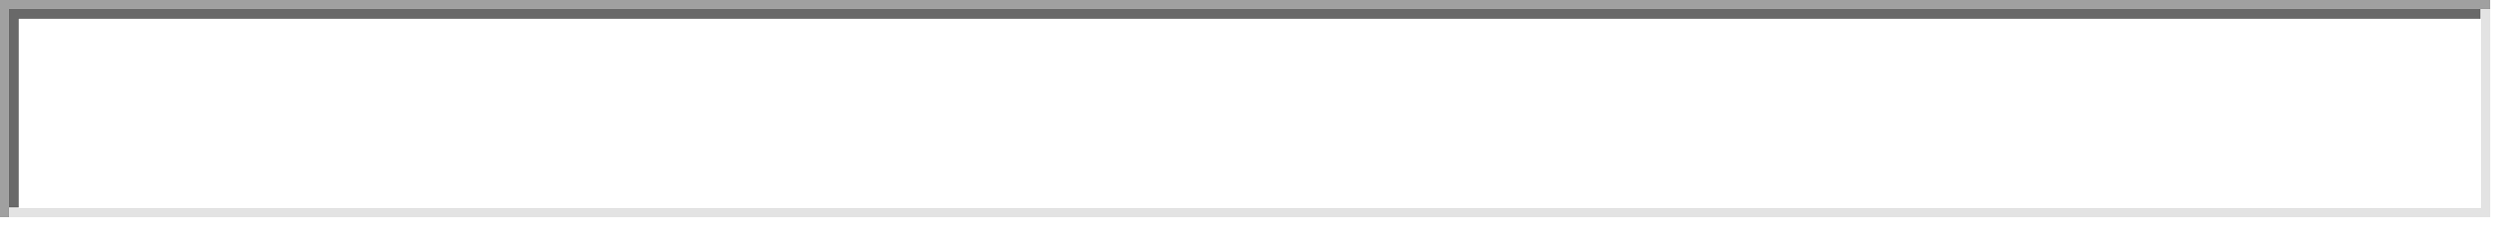


4. What is your gender?


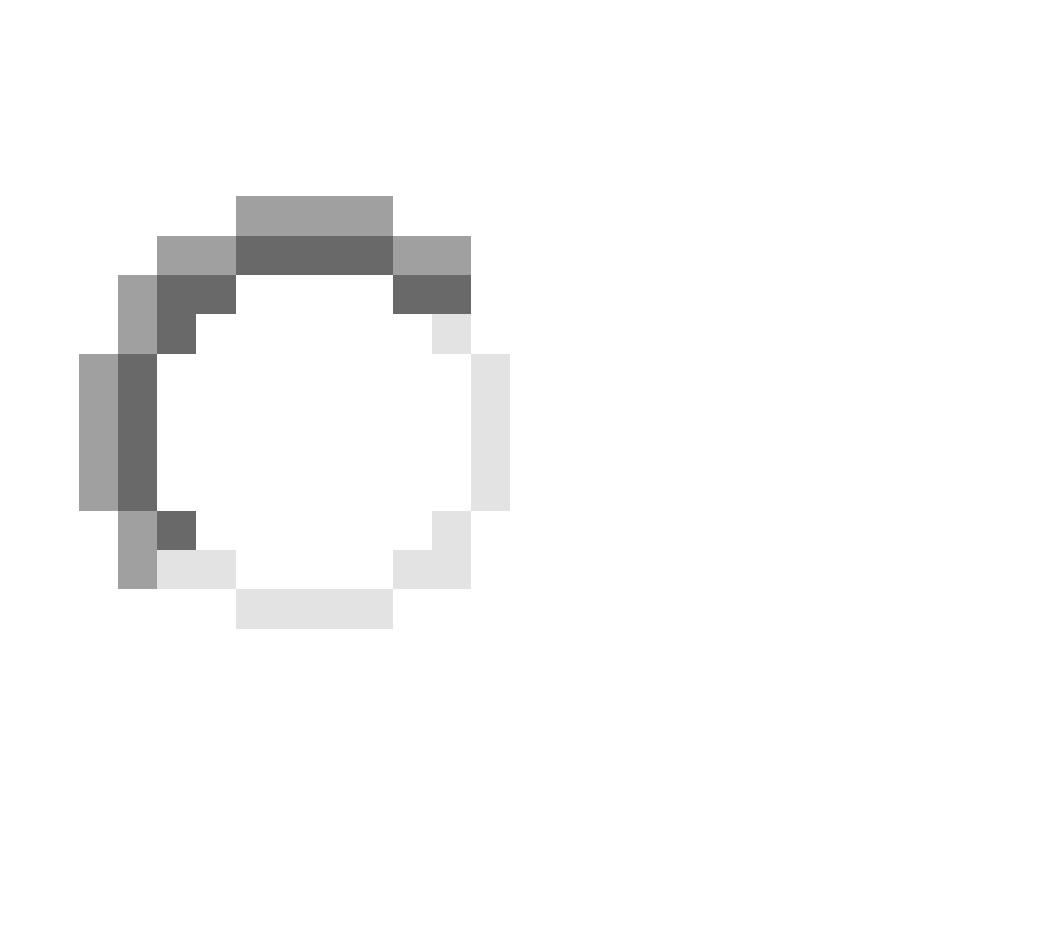
Male


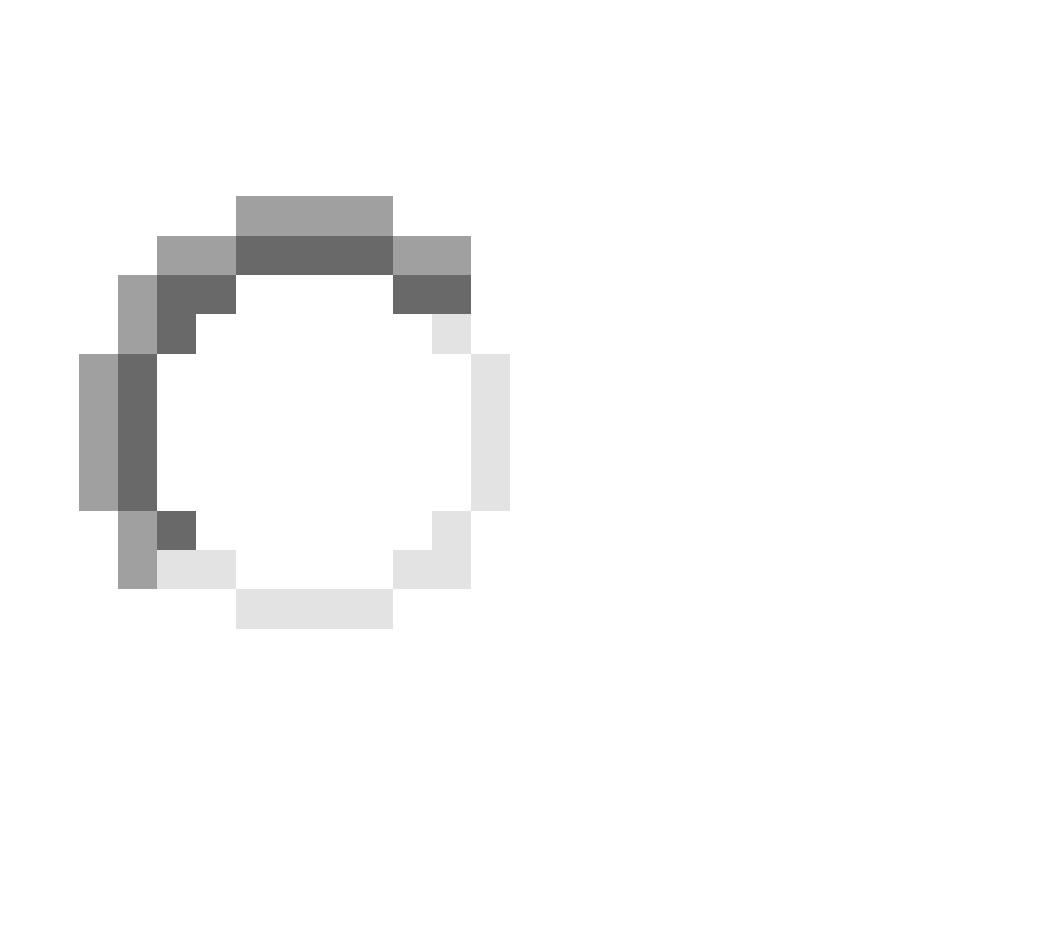
Female


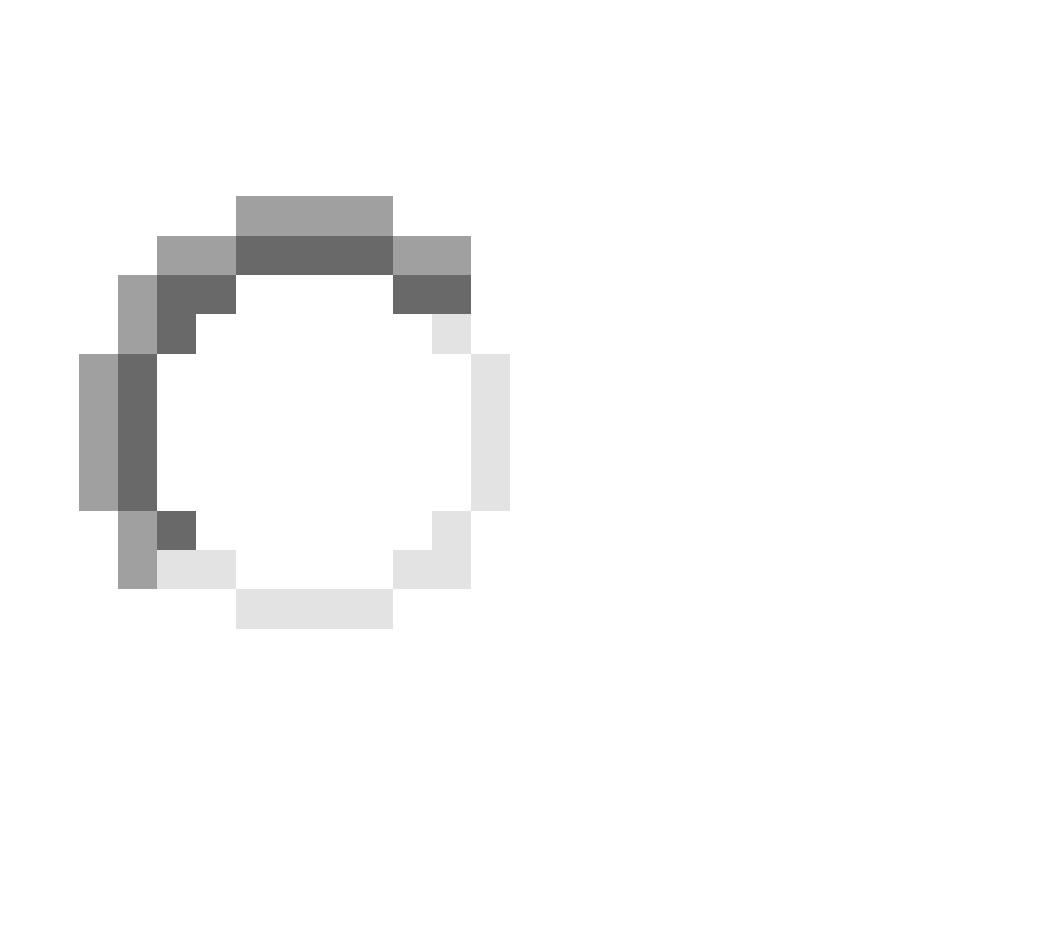
Non-Binary


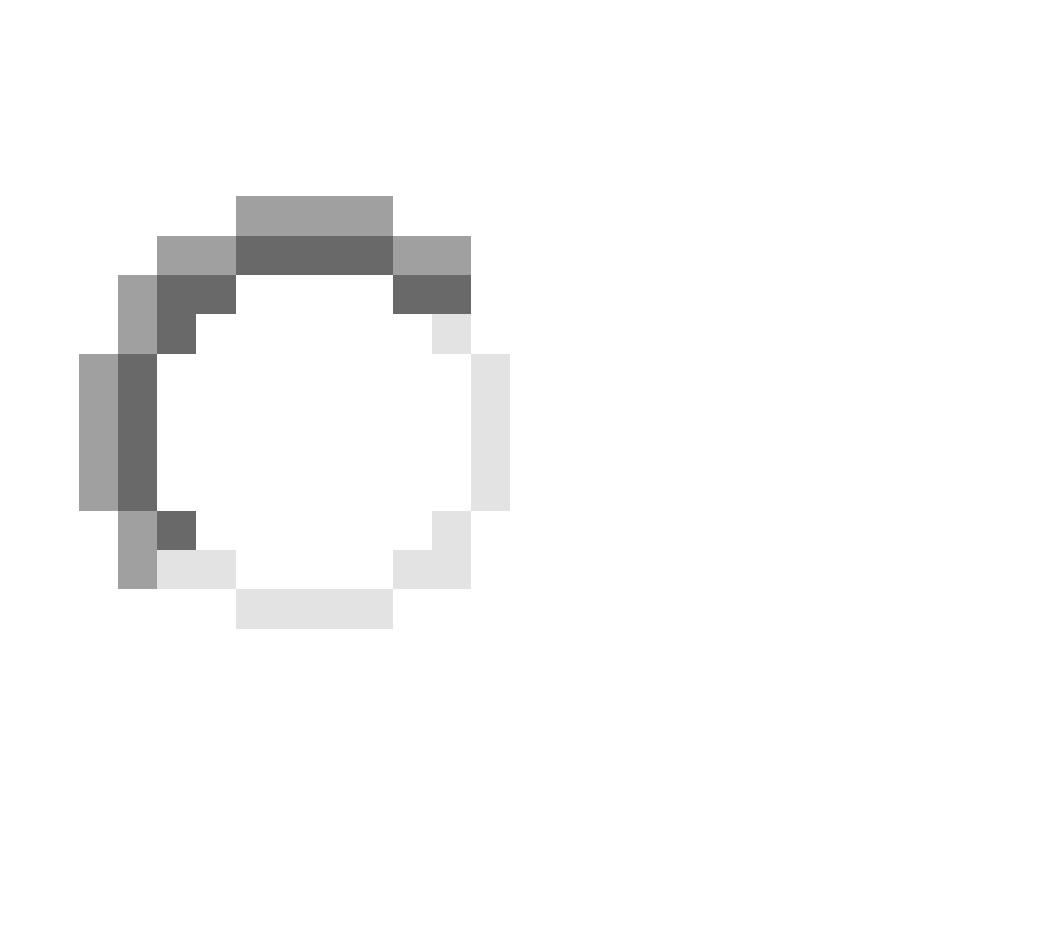
Prefer not to say.

5. How many hours of face-to-face ophthalmology teaching have you had?


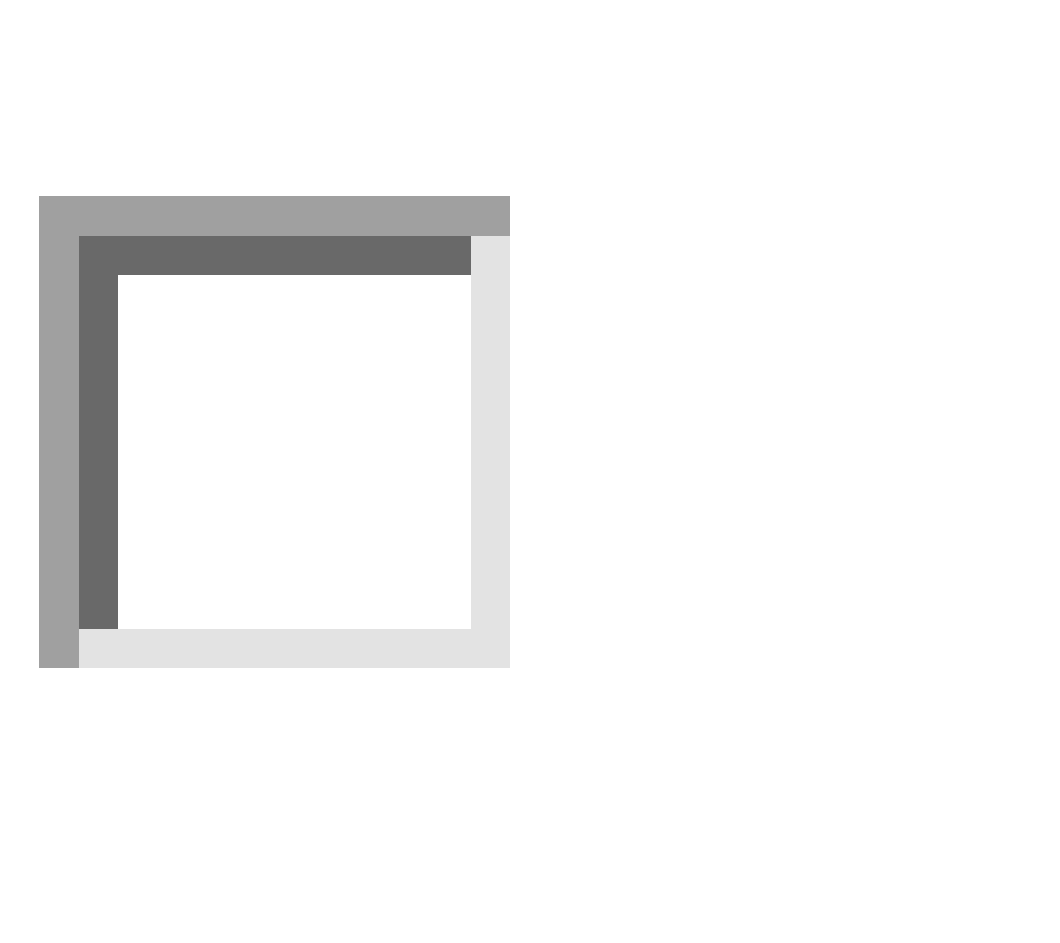
>20


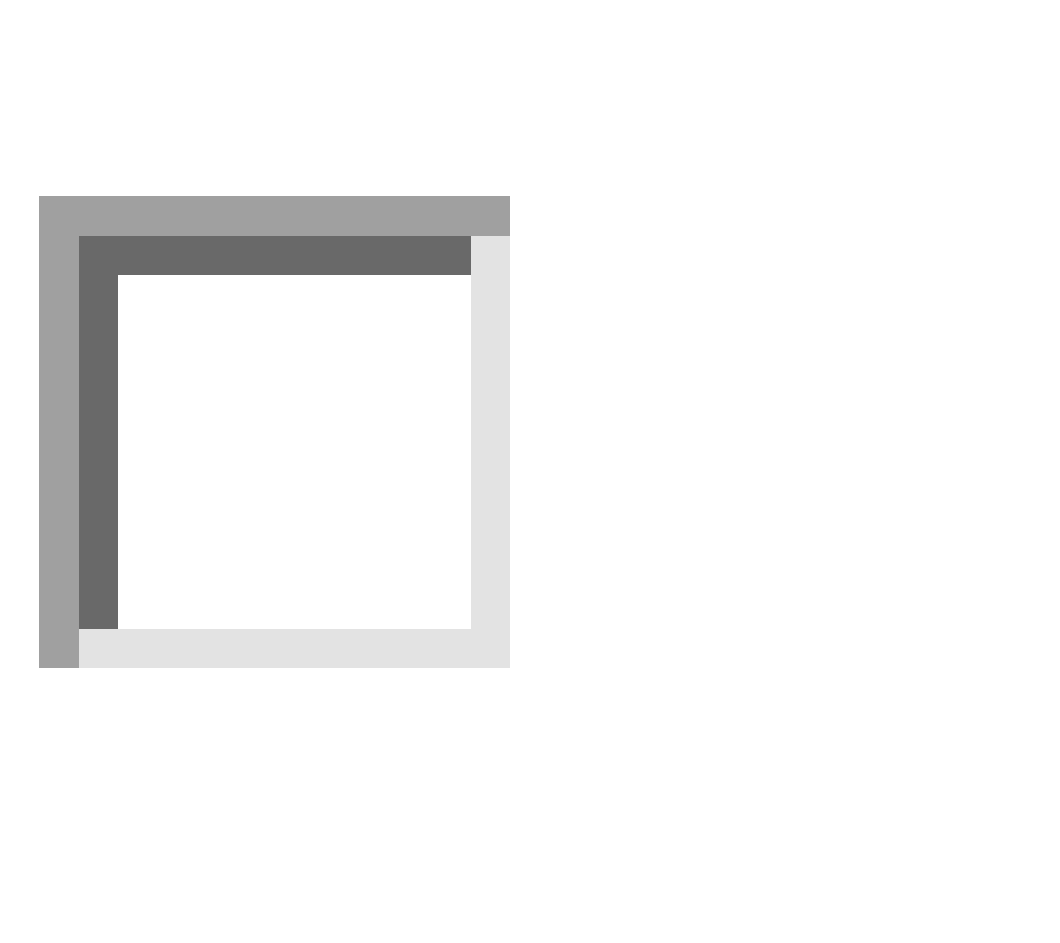
16-20


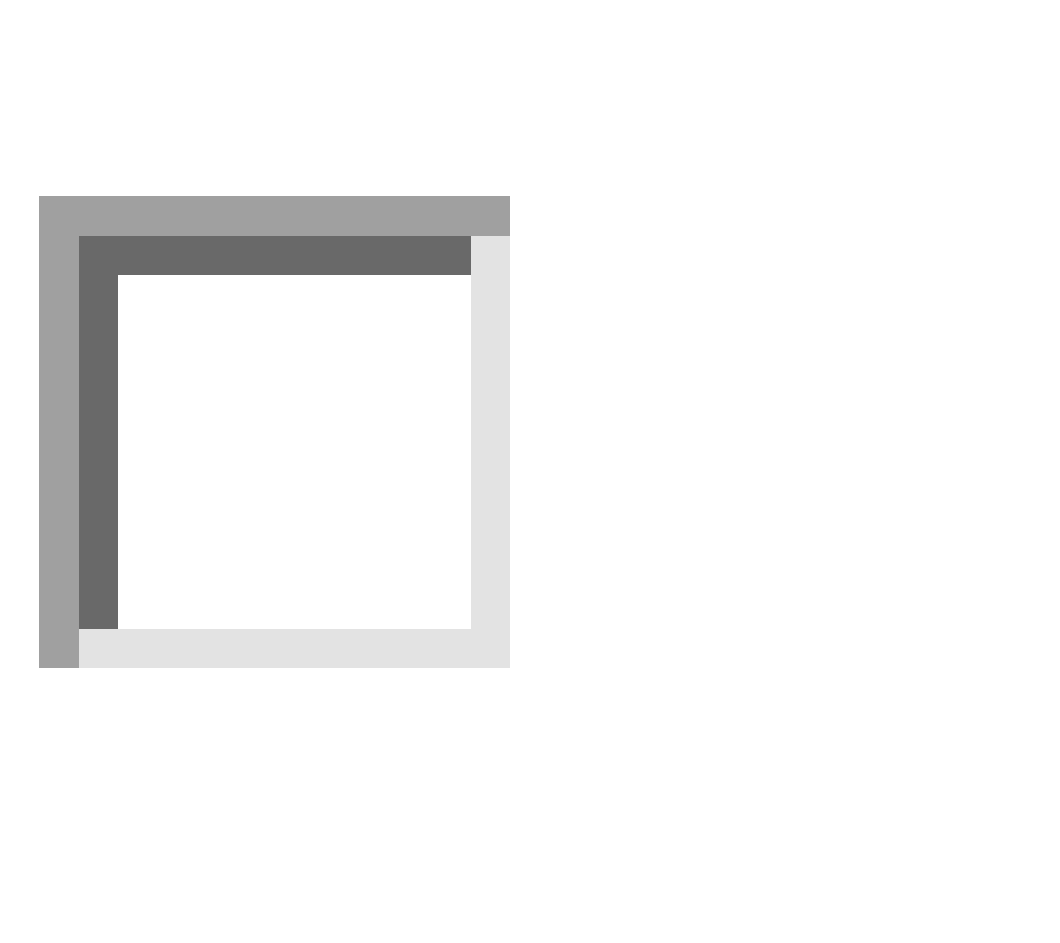
11-15


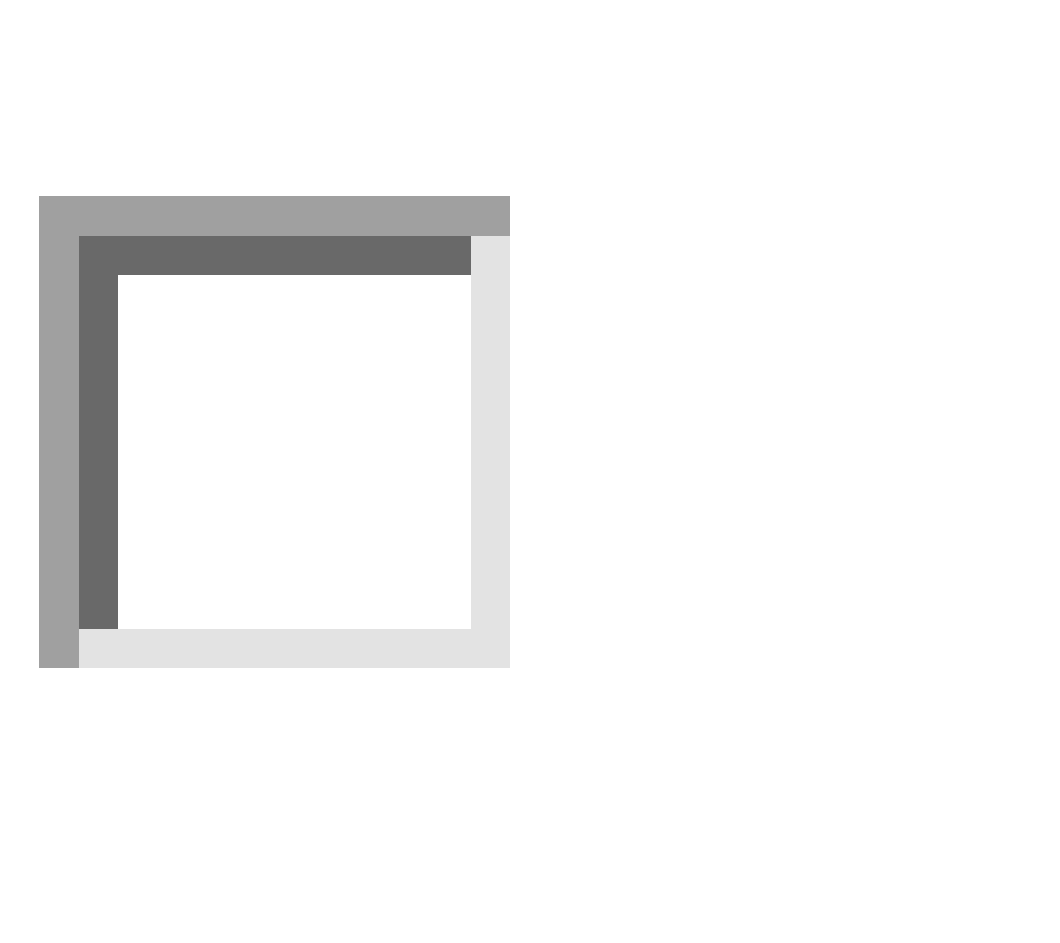
5-10


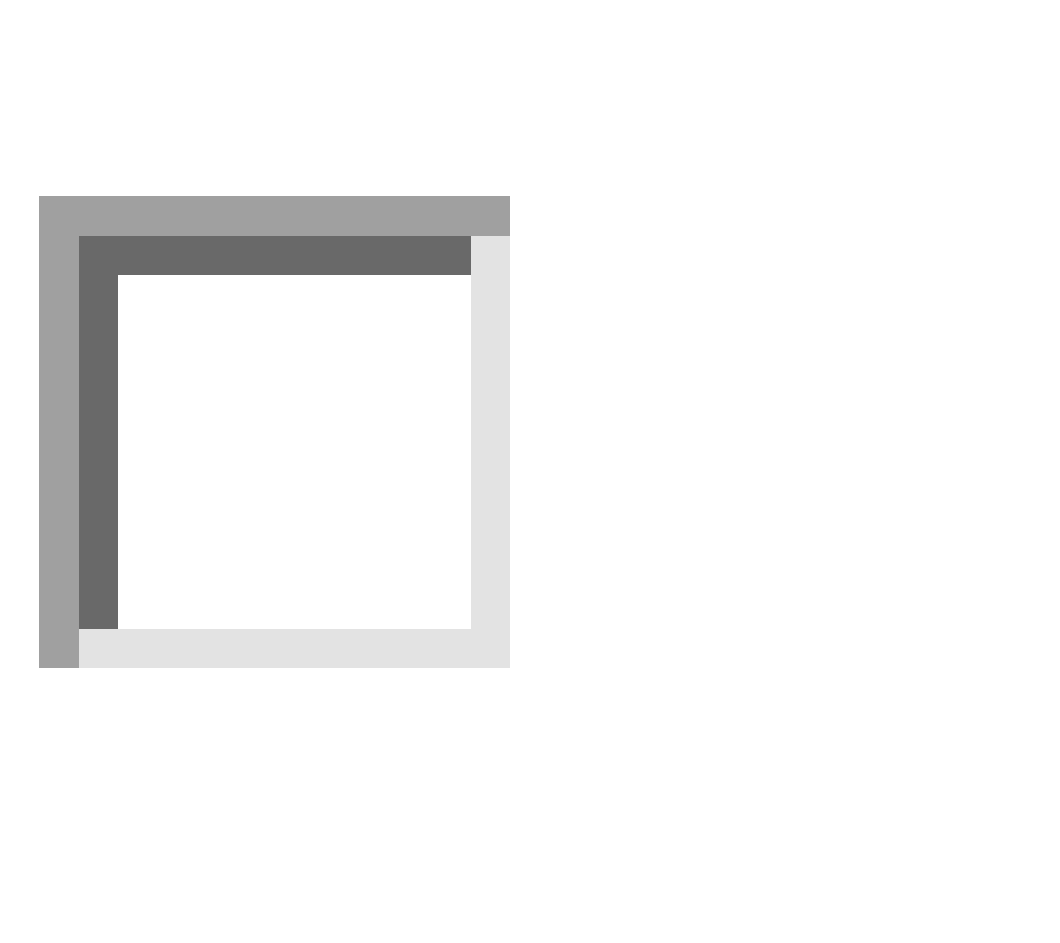
1-4


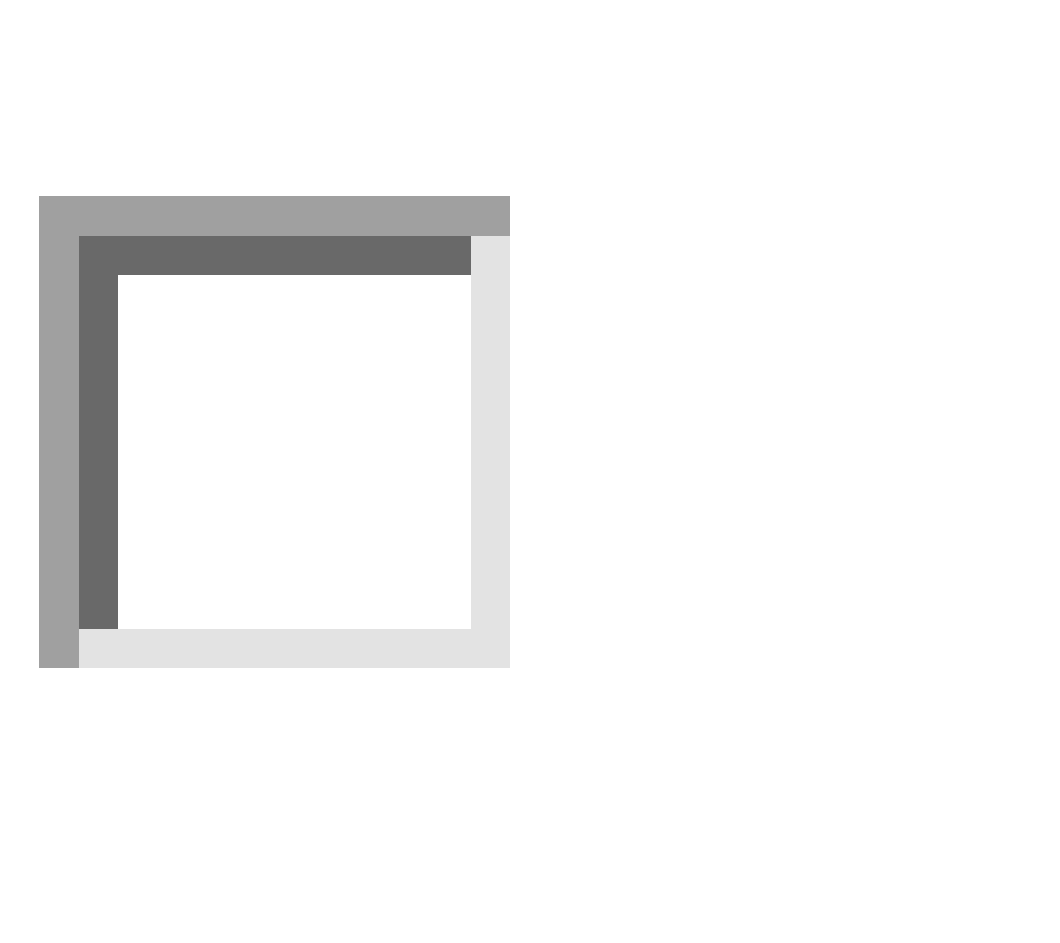
0

**General, informational, medical and ophthalmology educational use of WB and PN**

6. Do you use WB to learn in general?


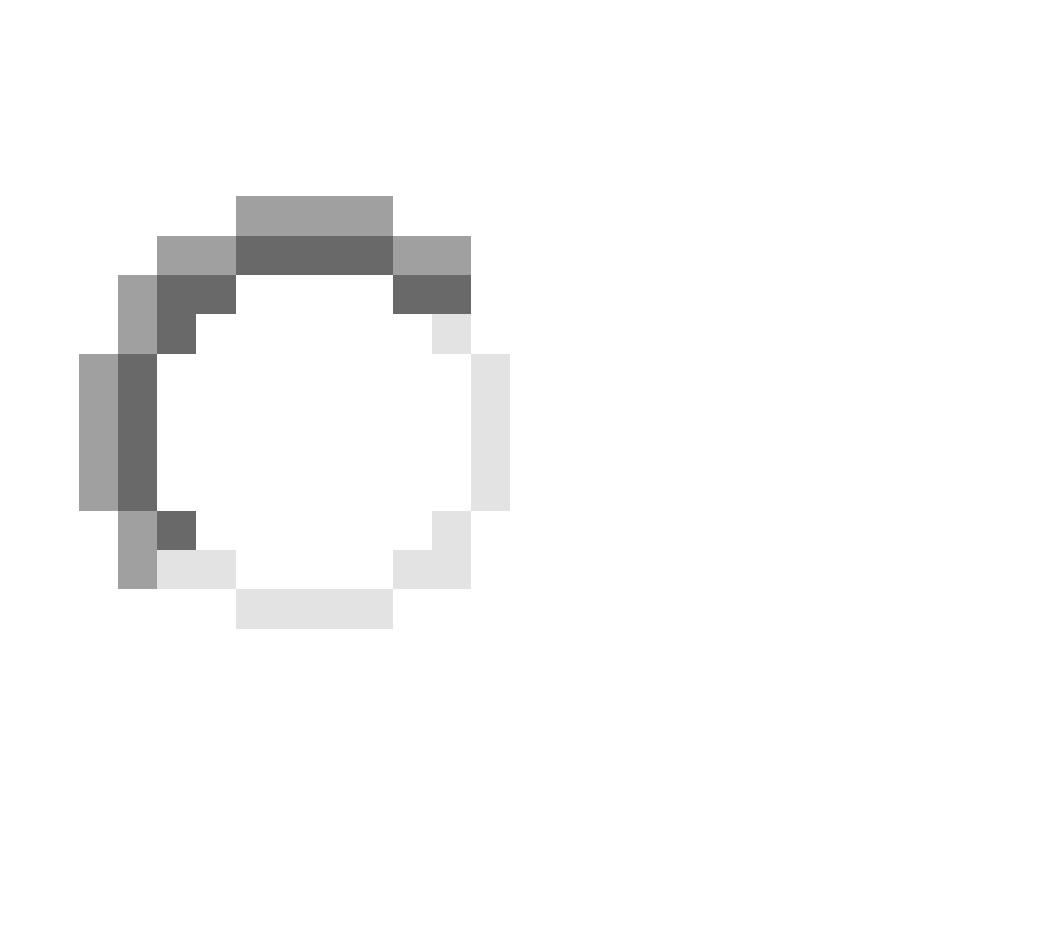
Yes


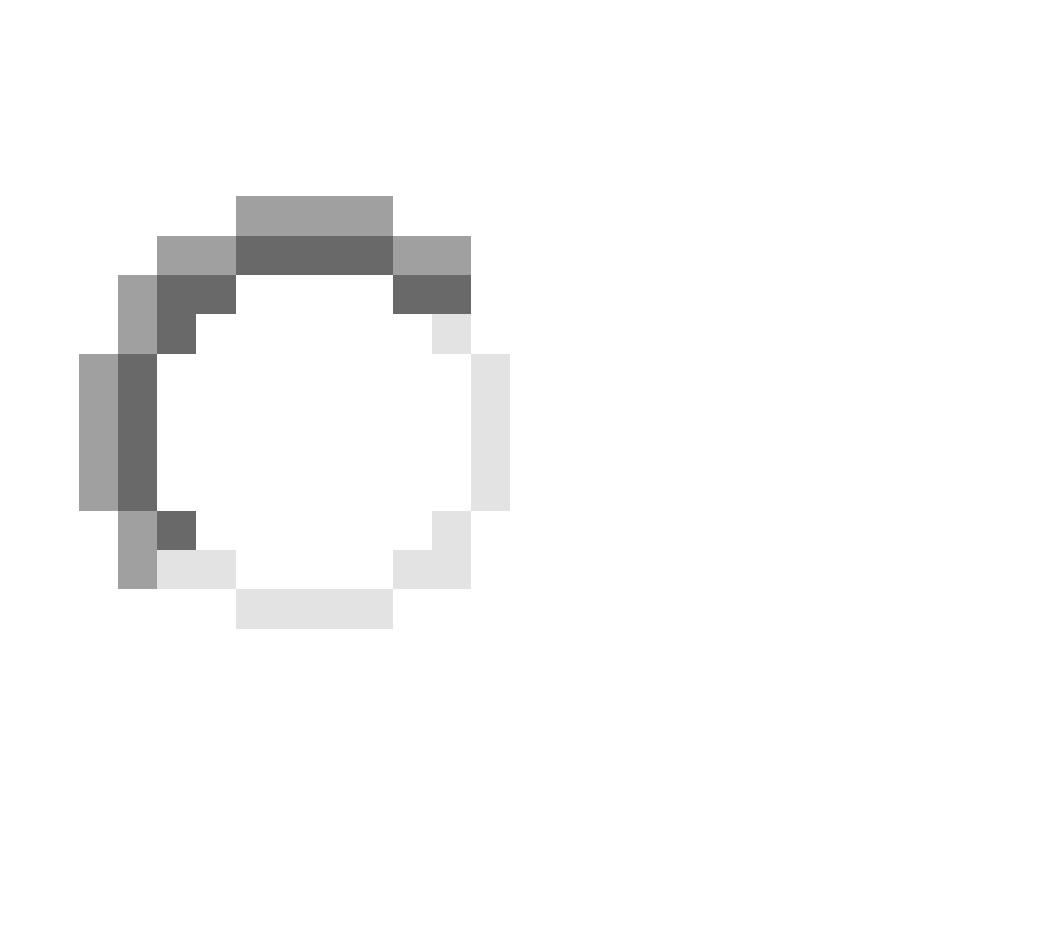
No

7. Do you use WB to learn clinical ophthalmology?


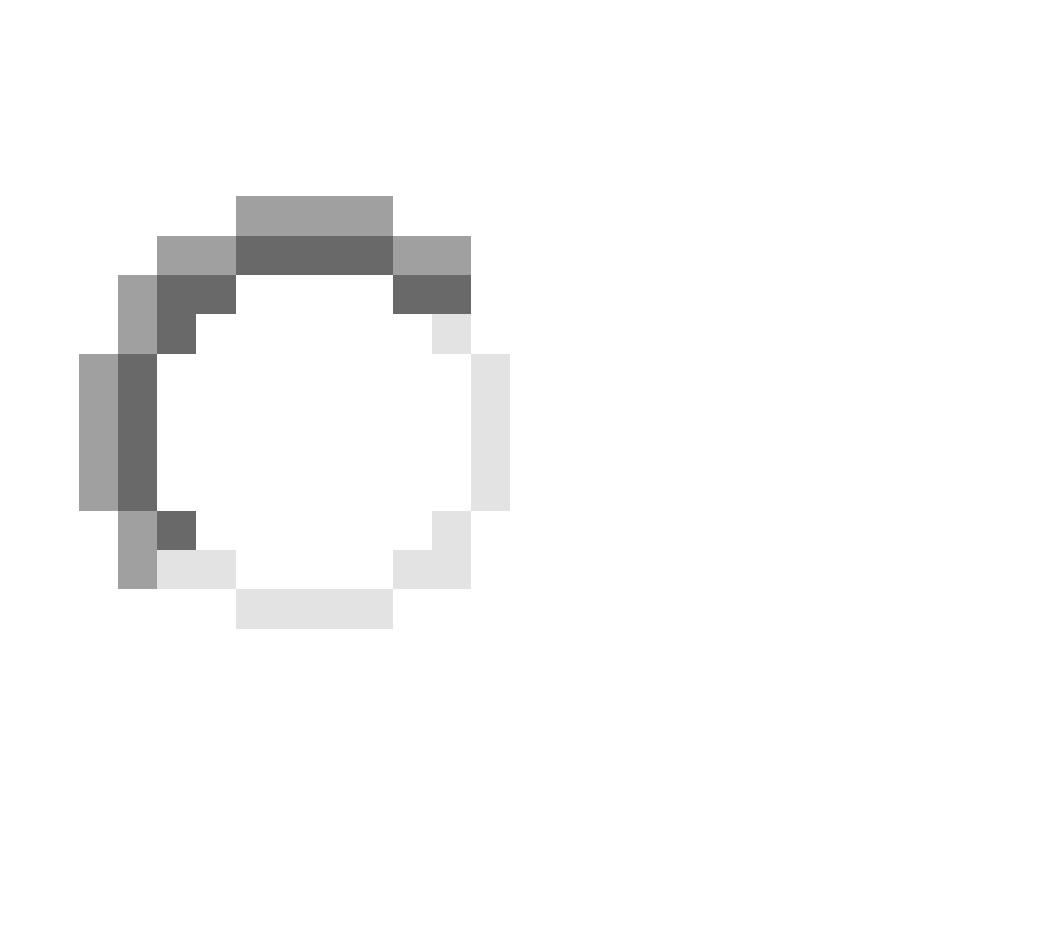
Yes


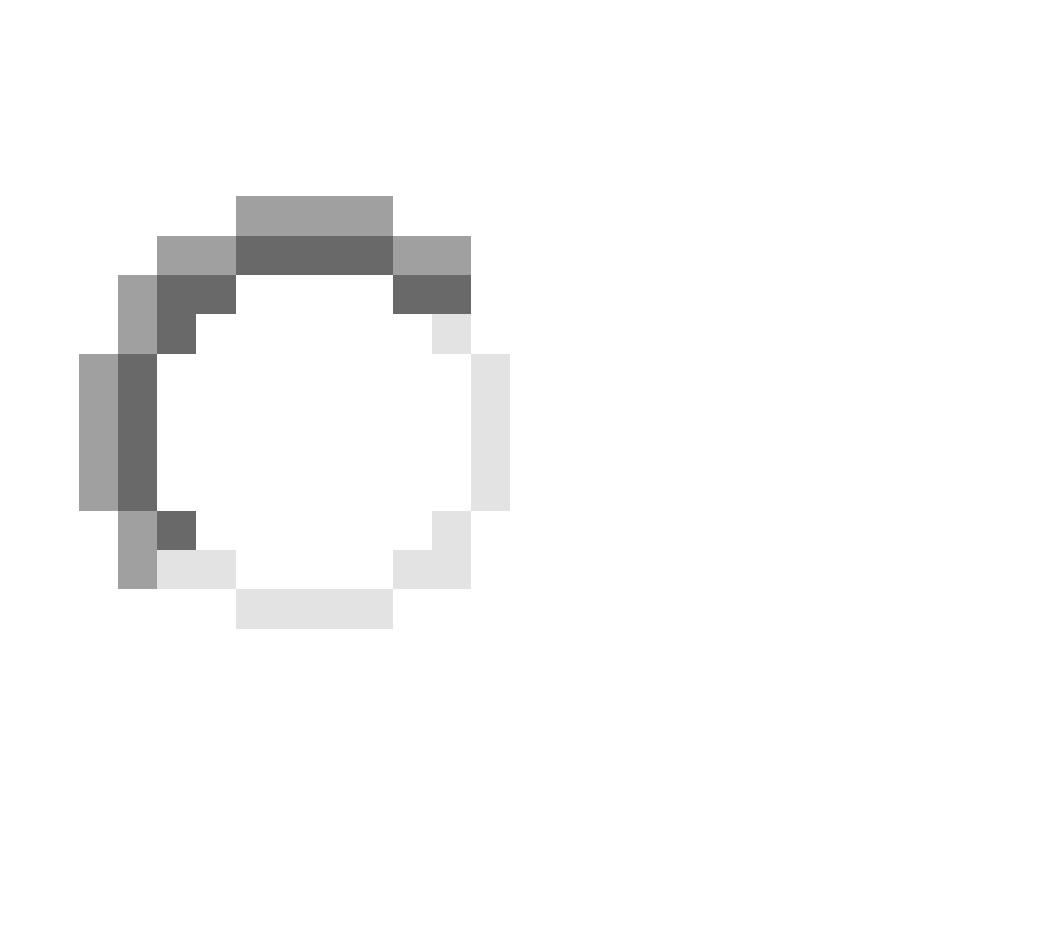
No

8. Have you come across WB for clinical ophthalmology?


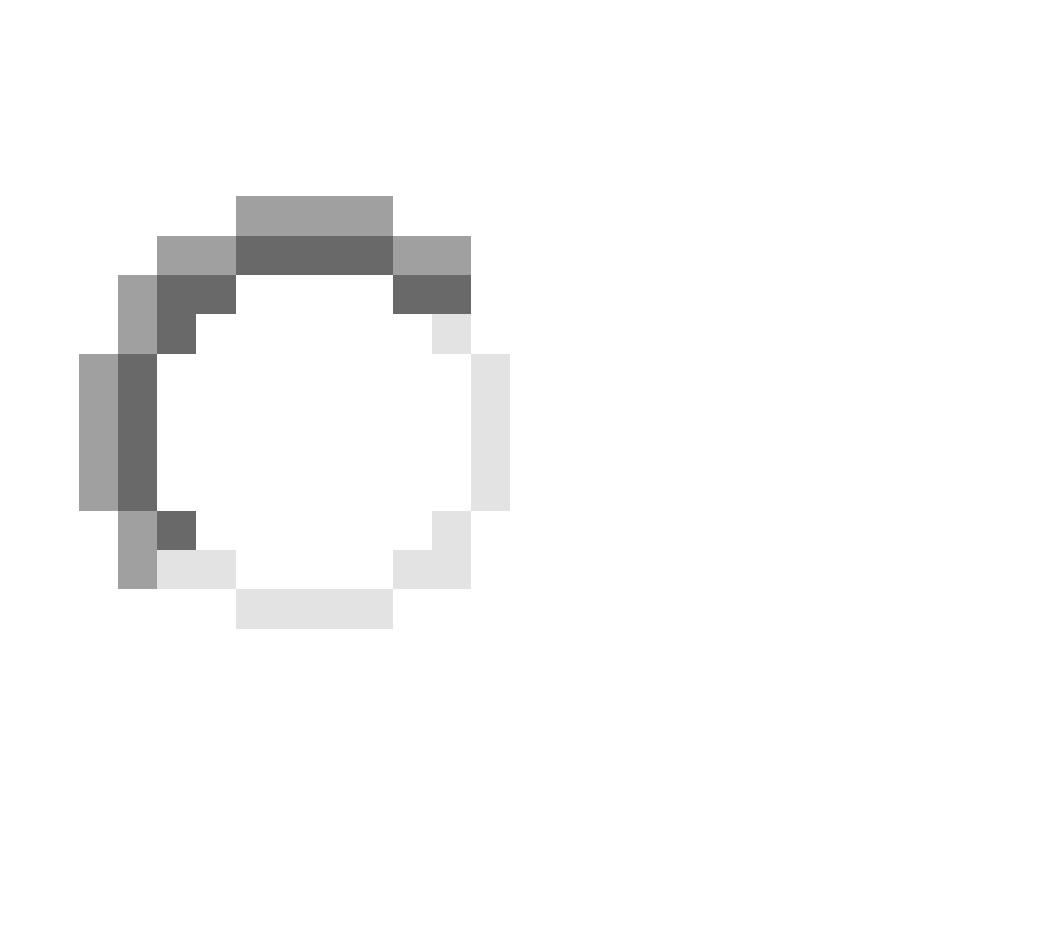
Yes


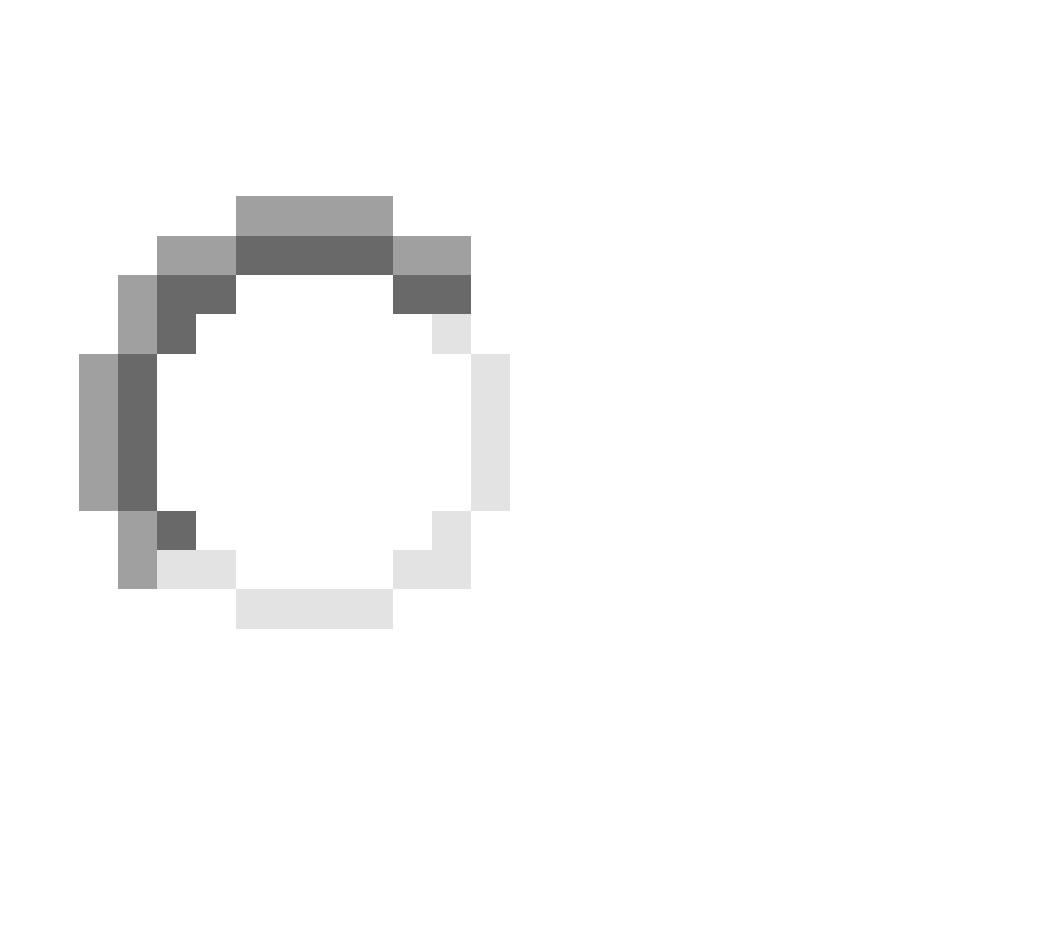
N

9. Have tutors ever told you to use WB to learn clinical ophthalmology?


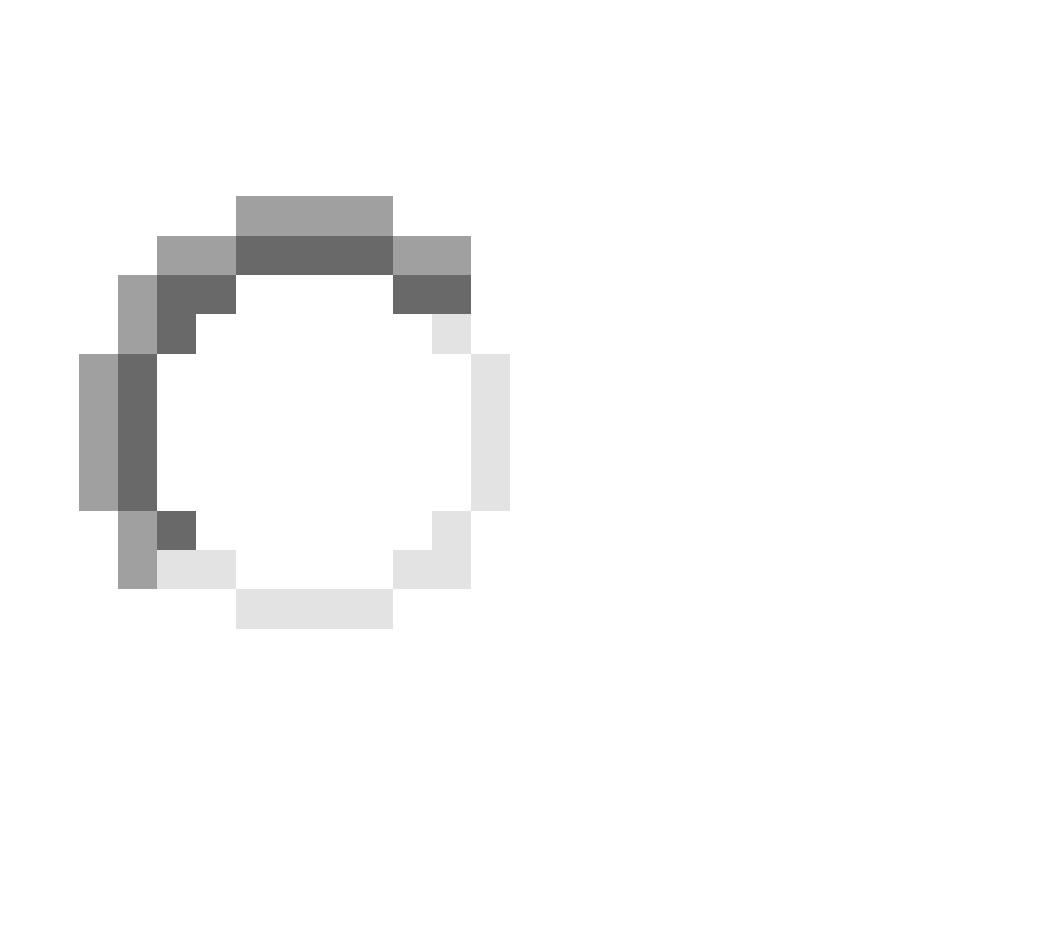
Yes


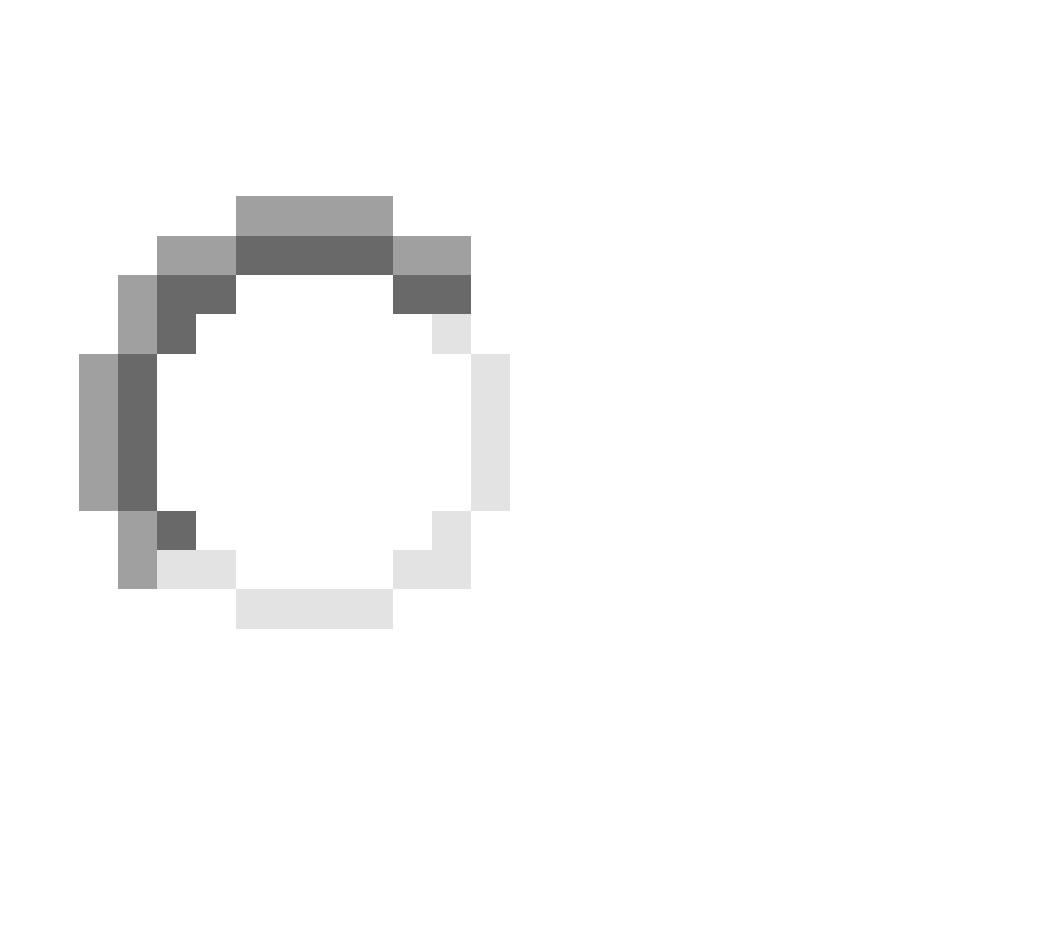
No

10. Do you use PN to learn in general?


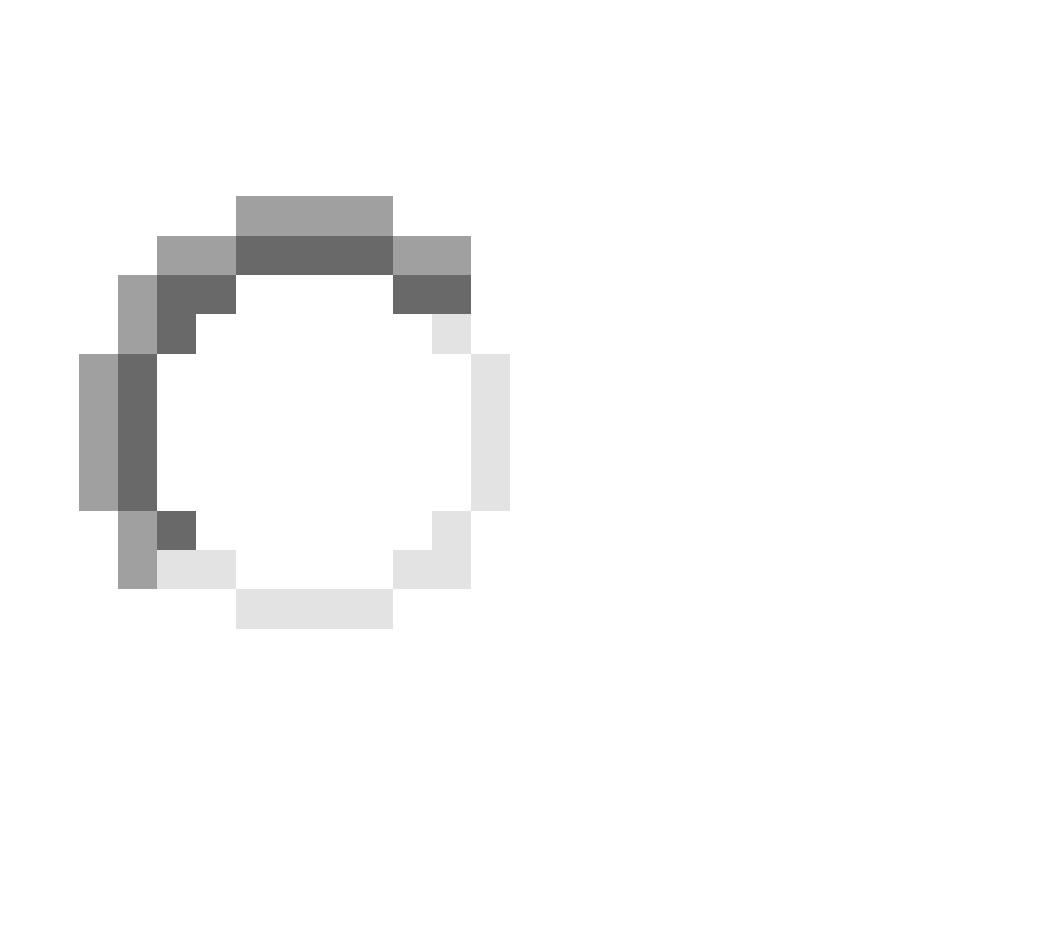
Yes


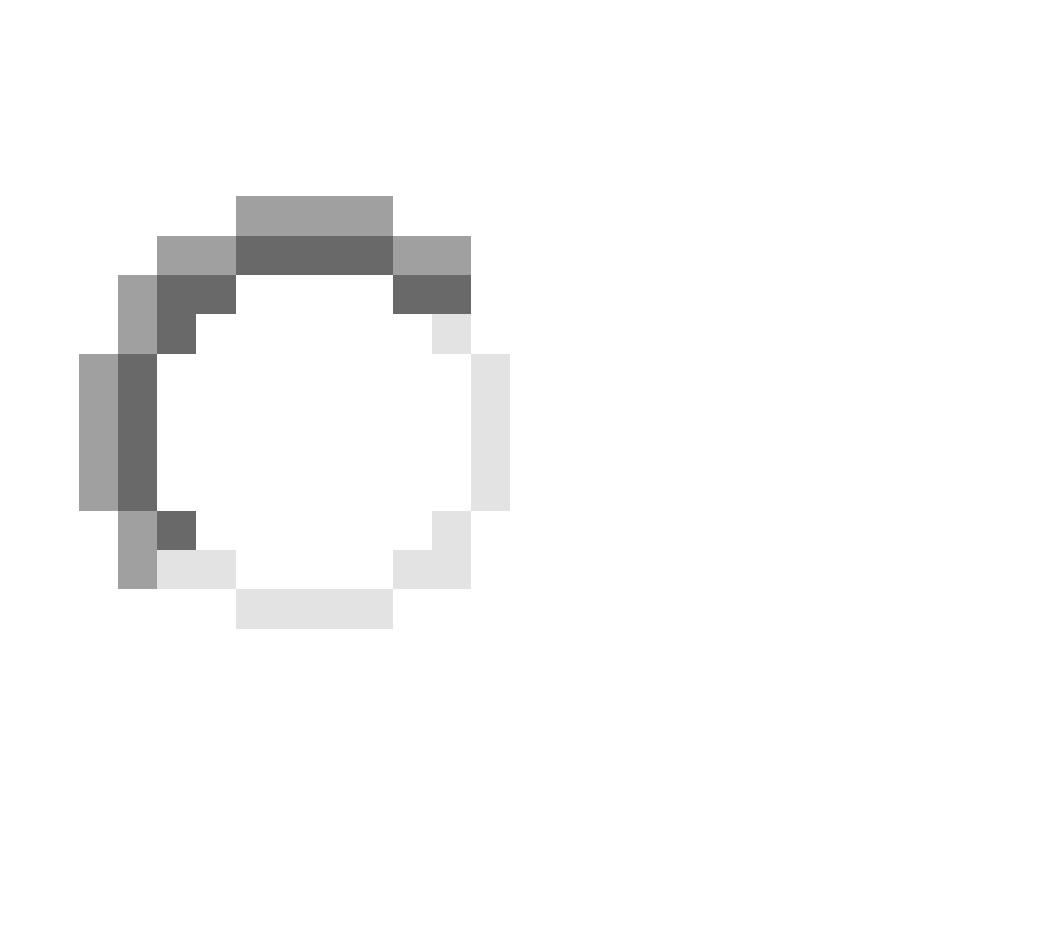
No

11. Do you use PN to learn clinical ophthalmology?


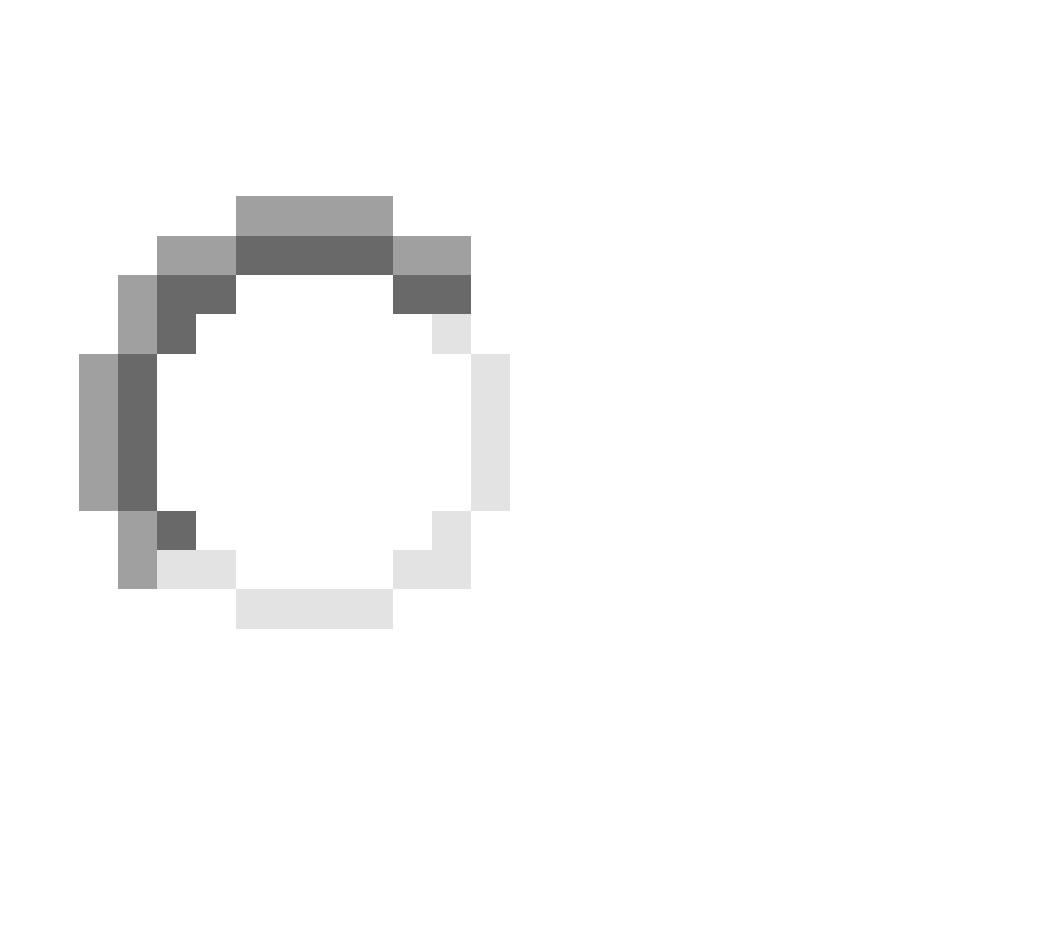
Yes


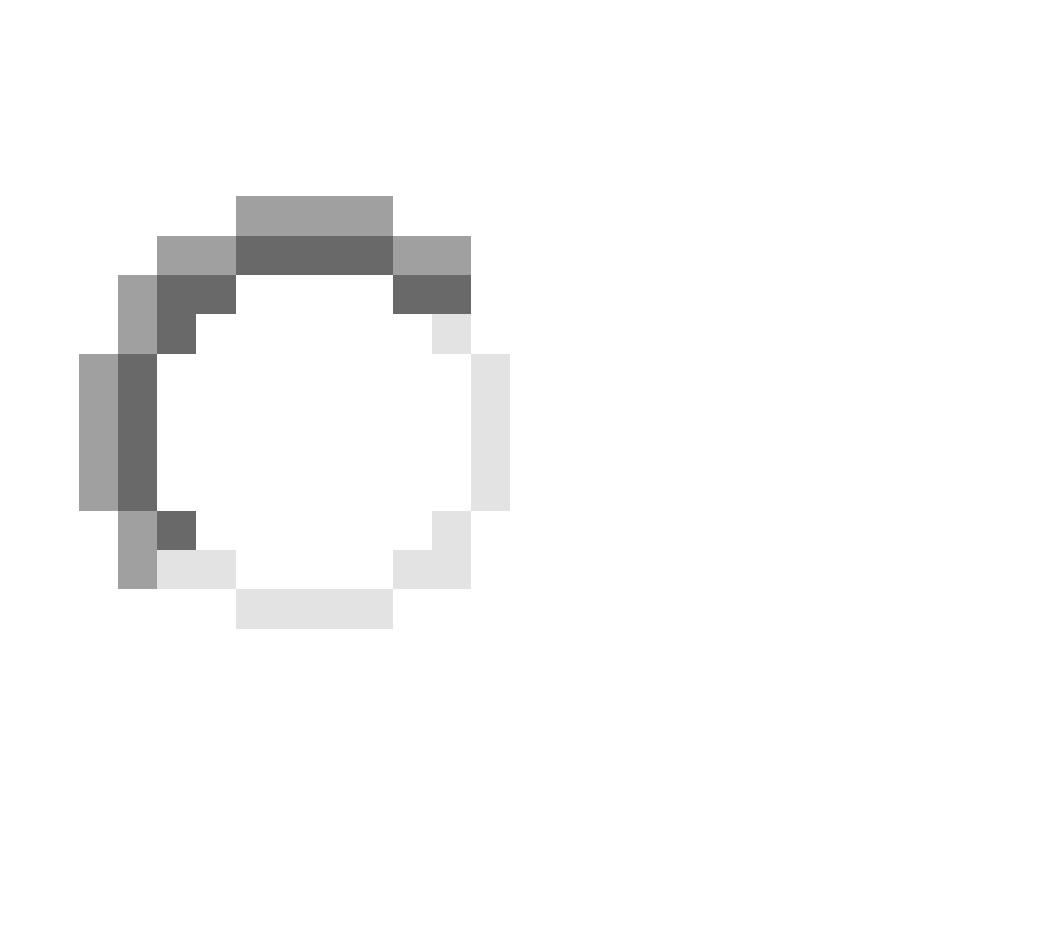
No

12. Have you come across any PN for clinical ophthalmology?


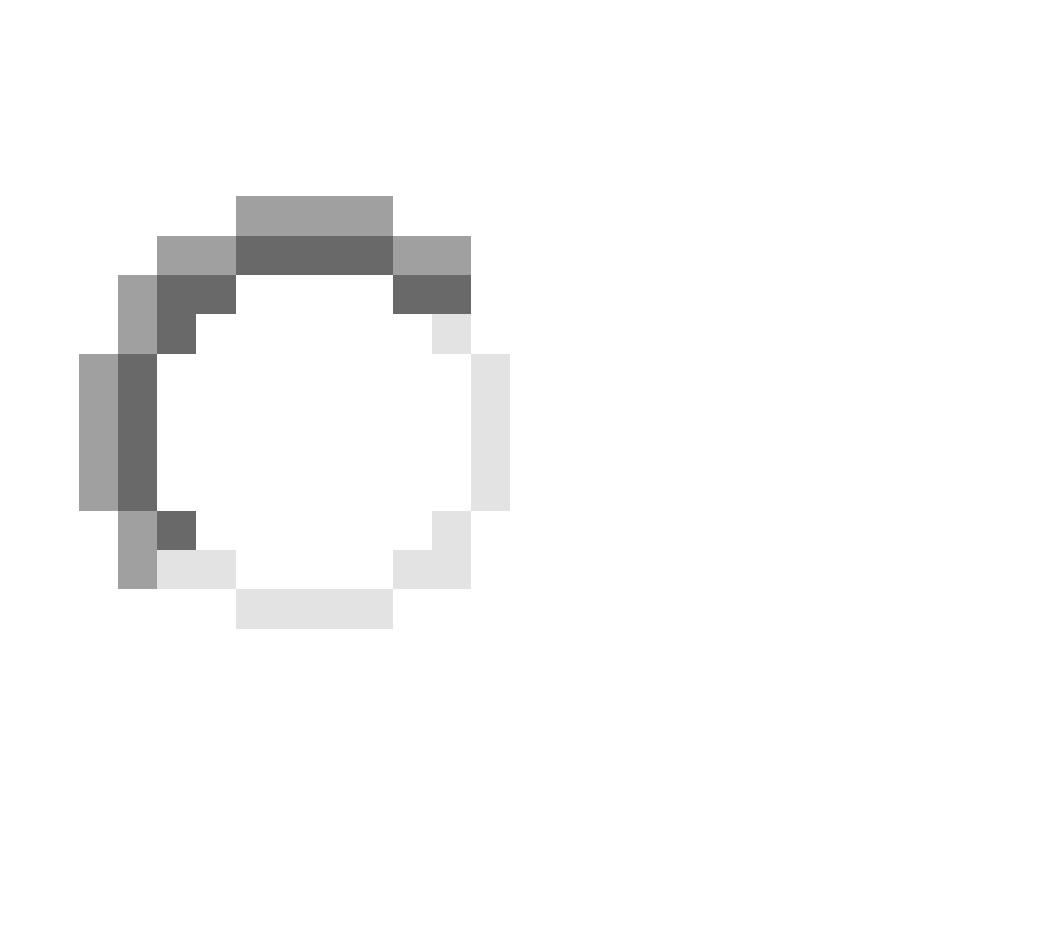
Yes


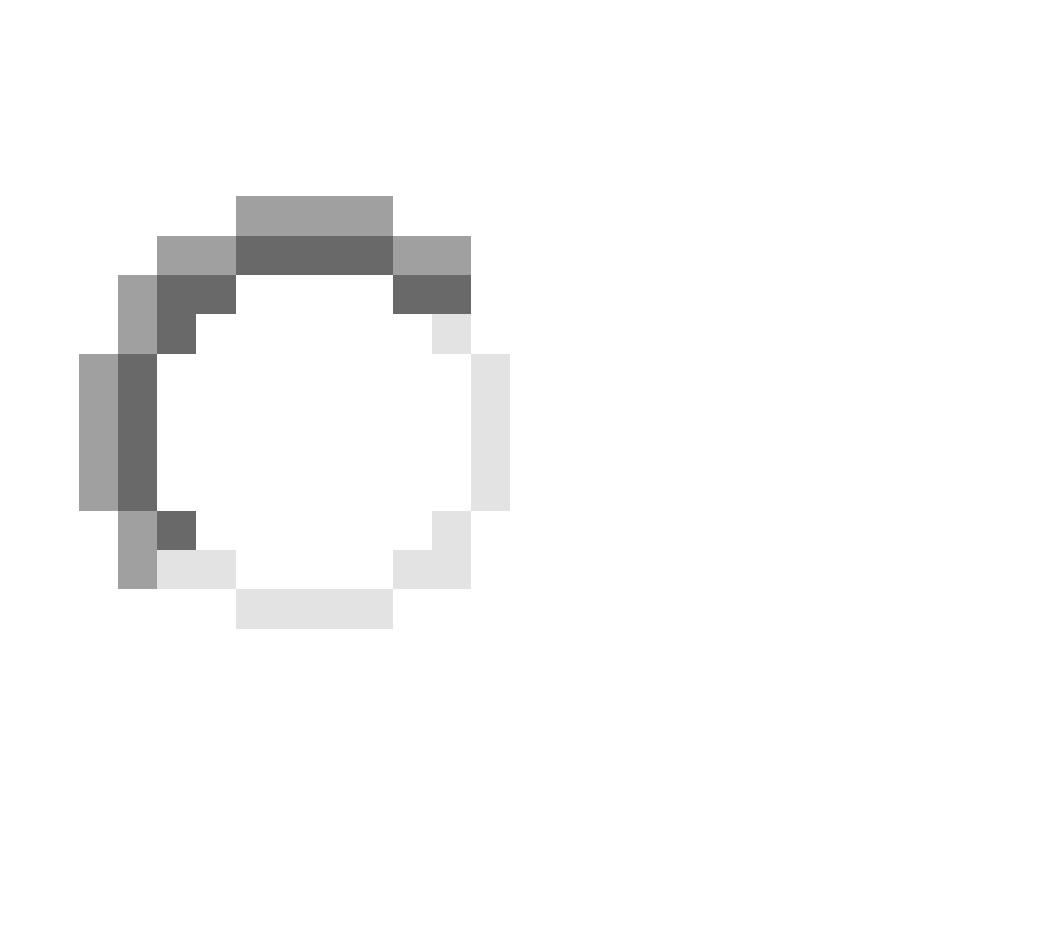
N

13. Have tutors ever told you to use PN to learn clinical ophthalmology?


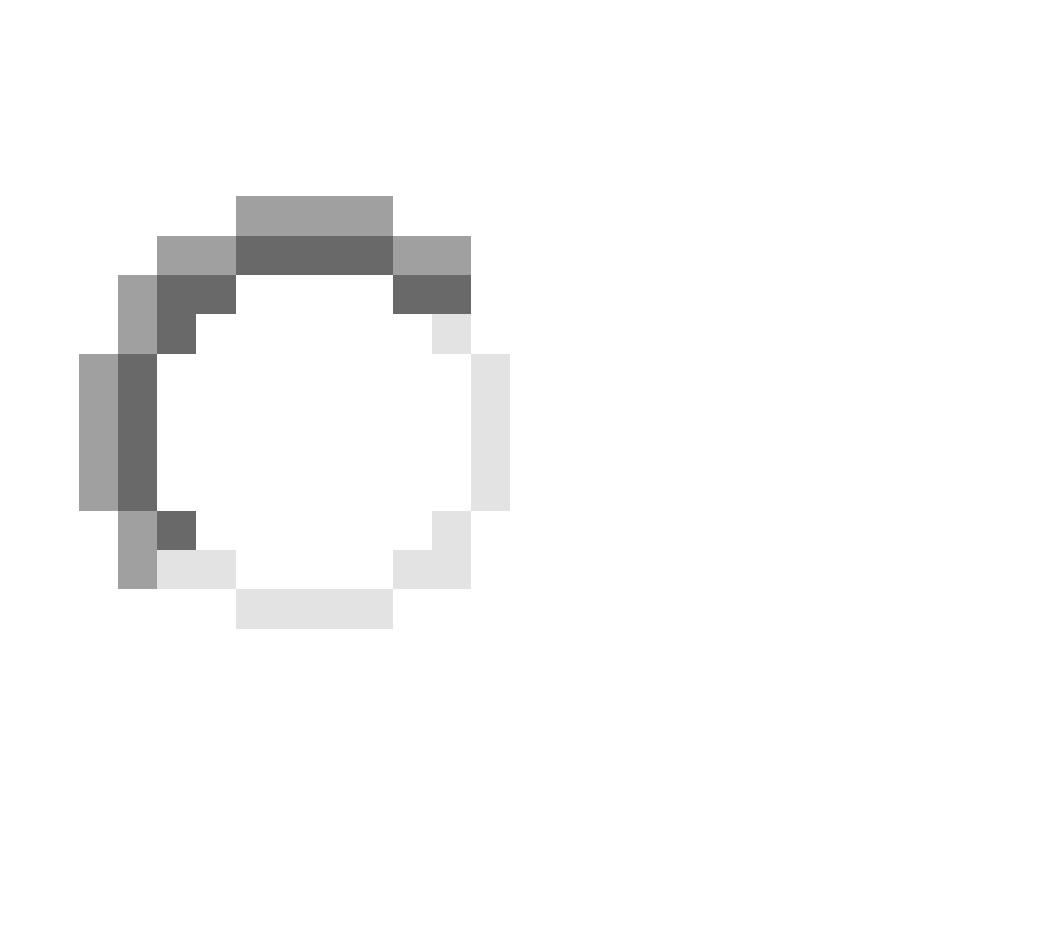
Yes


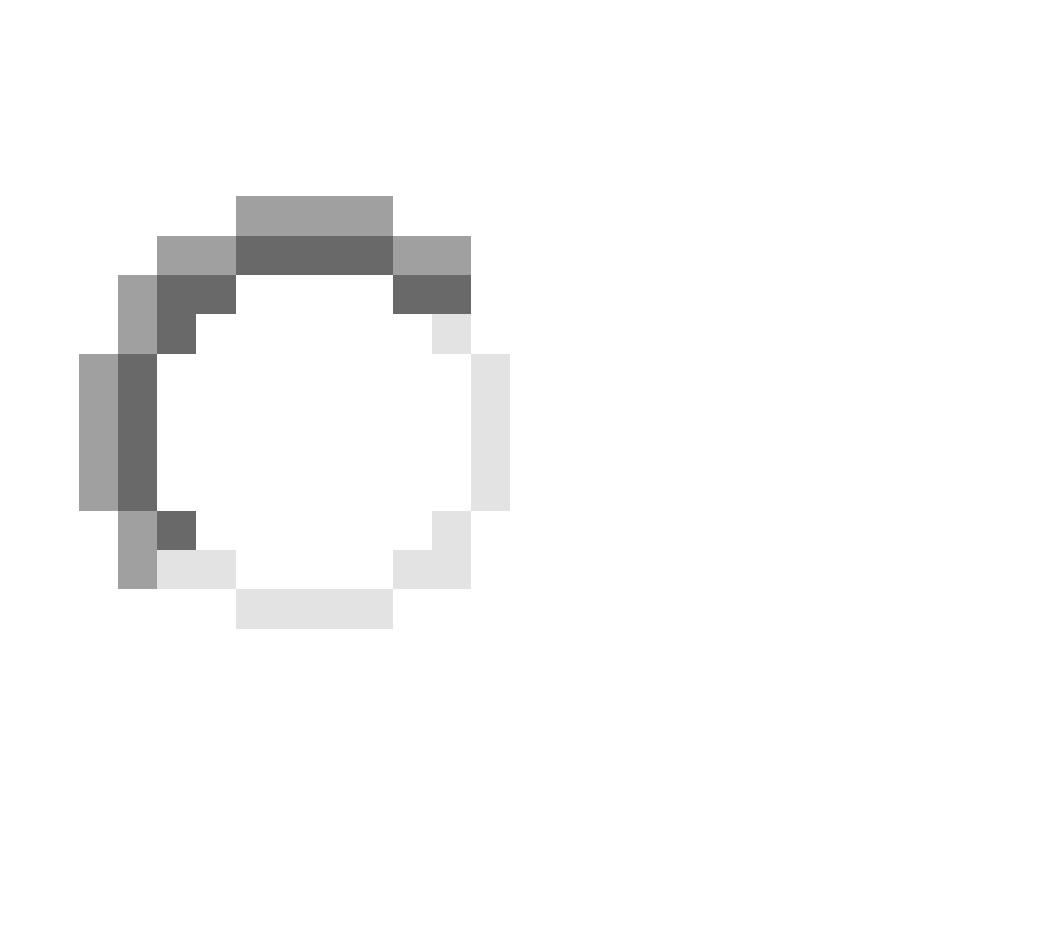
No

**Qualities and Satisfaction of Videos on Learning**

14. Is WB like this engaging?


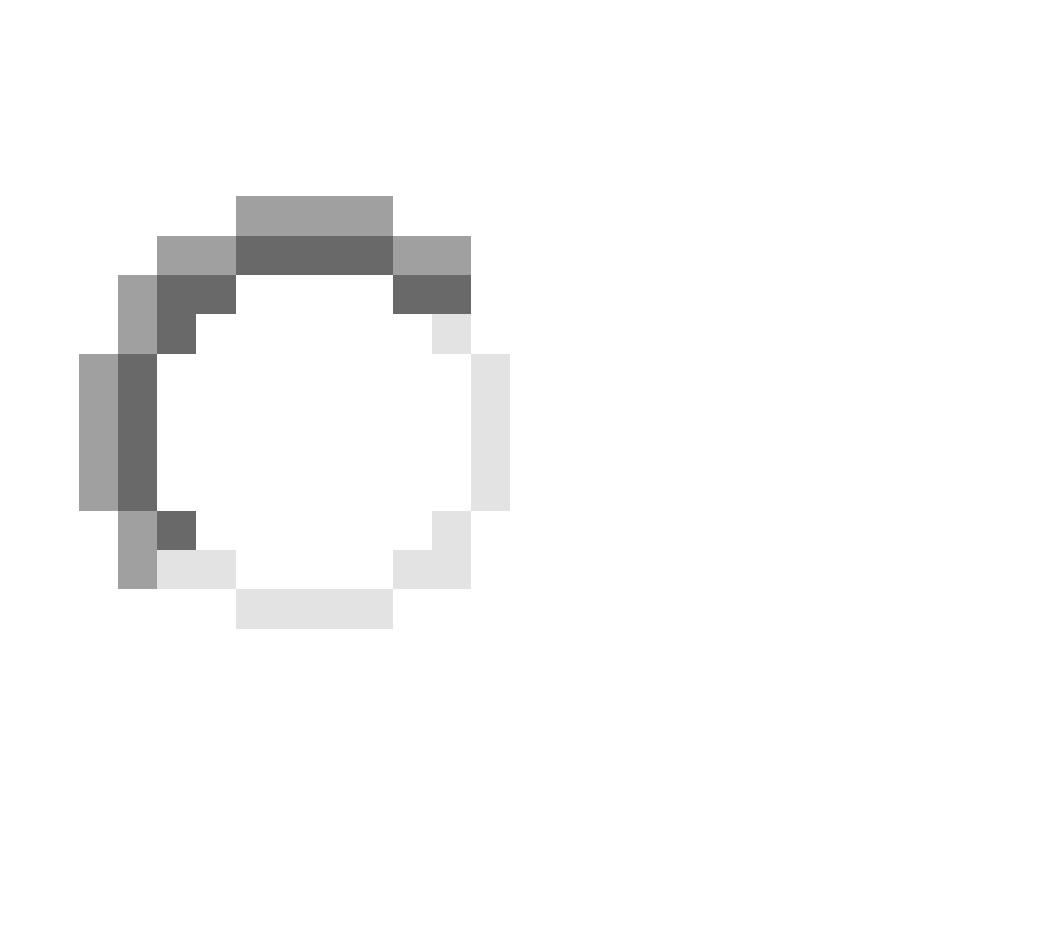
Yes


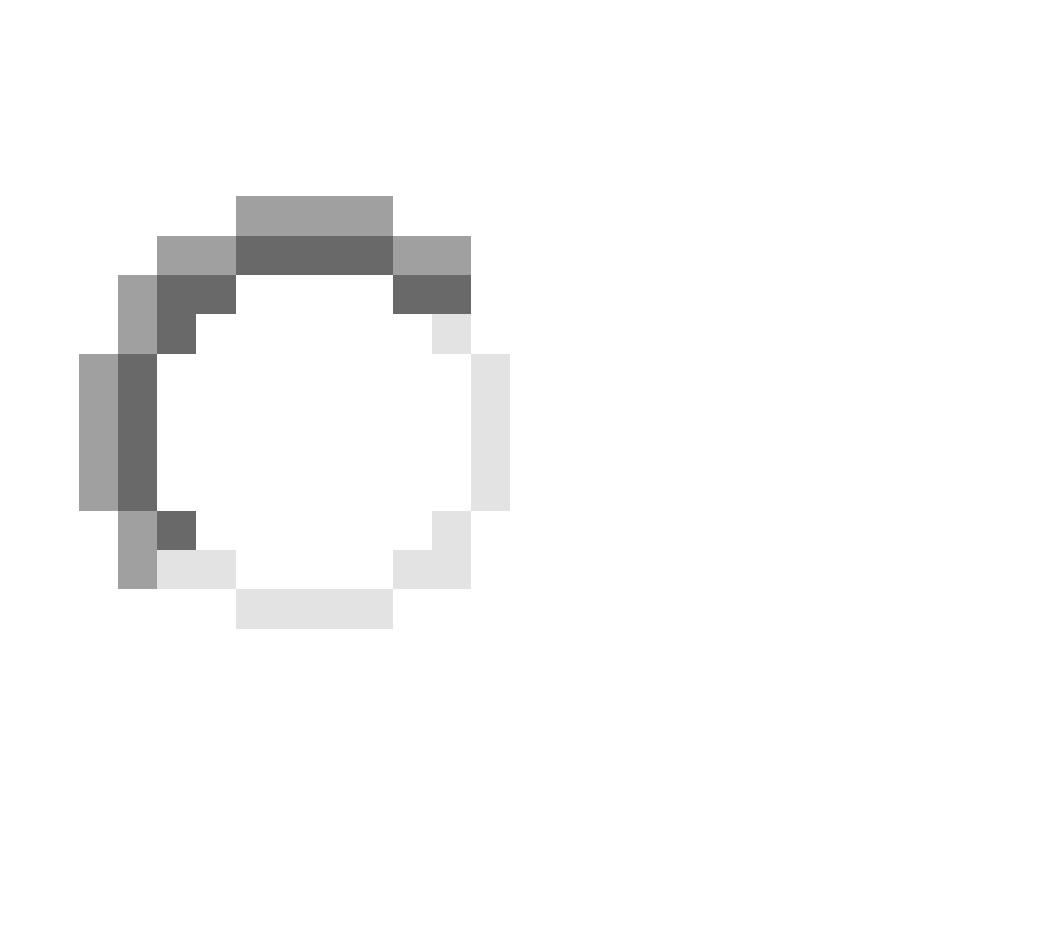
No

15. Do you feel WB like this help with understanding?


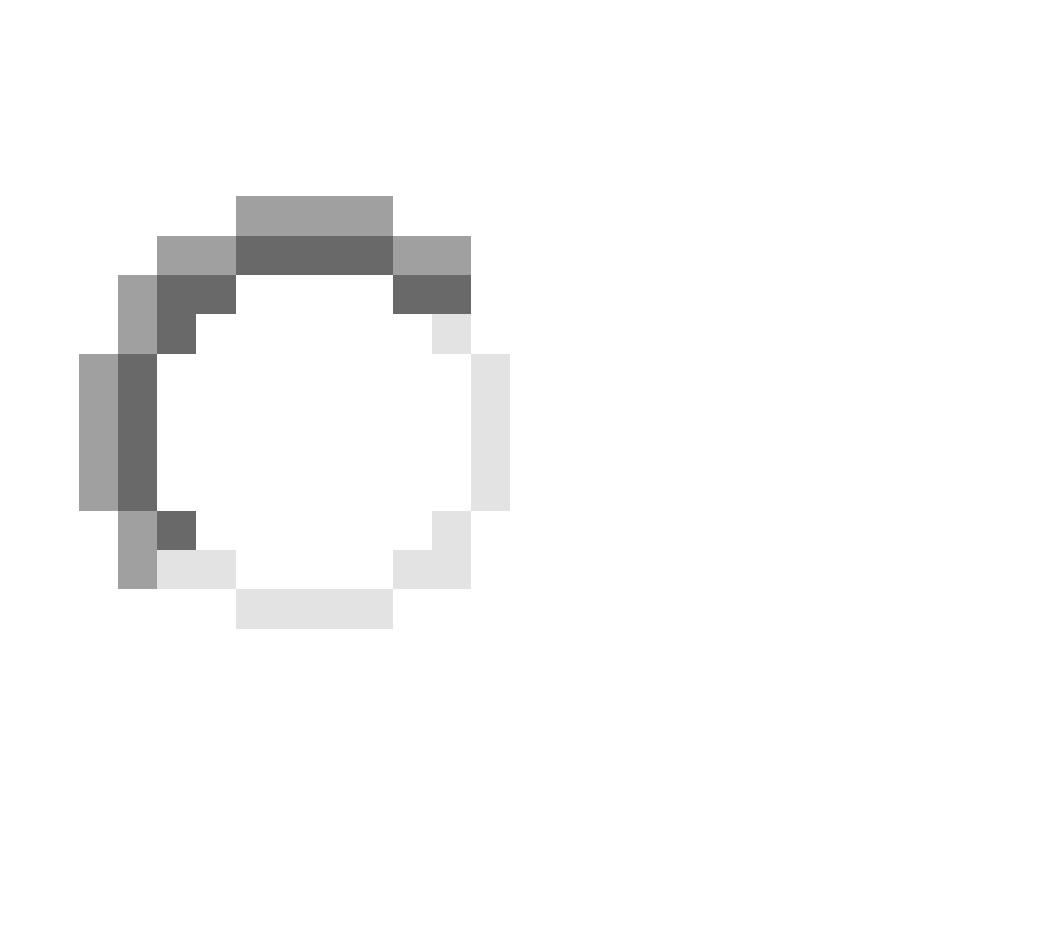
Yes


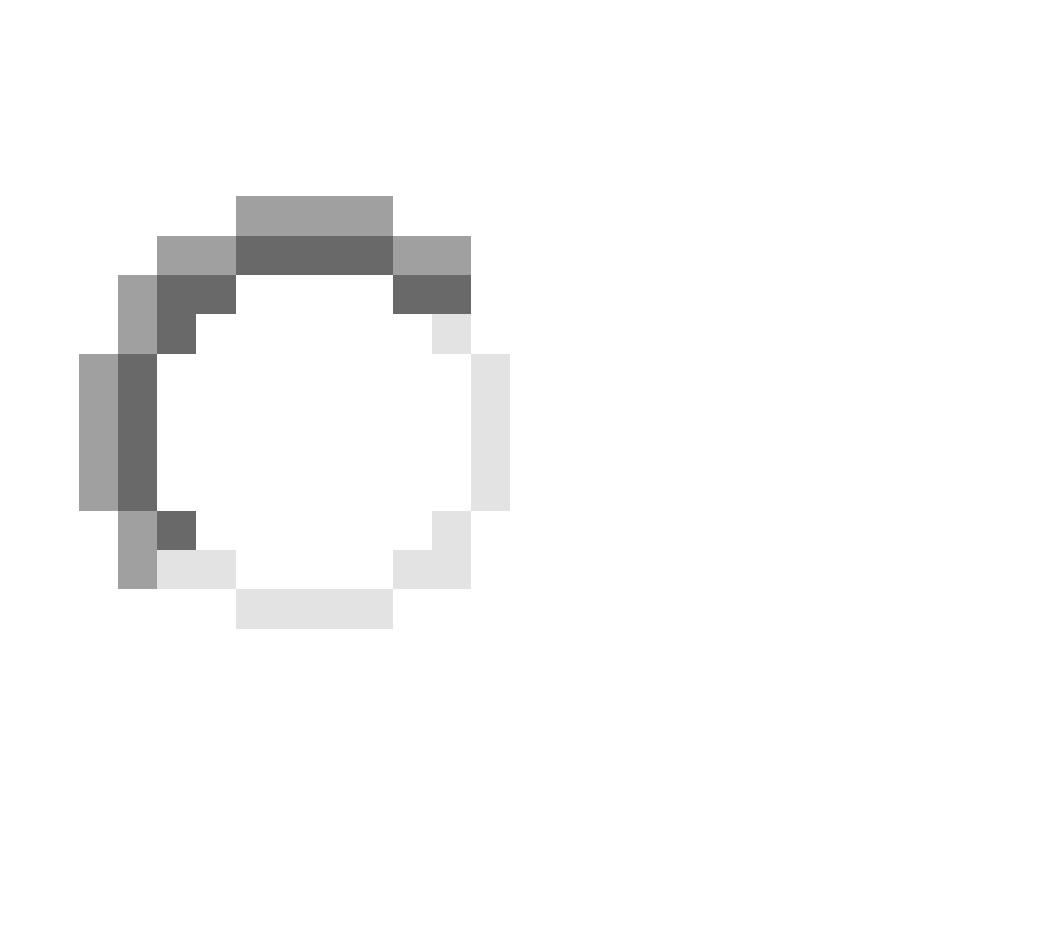
No

16. Do you feel WB like this help with memory and recall?


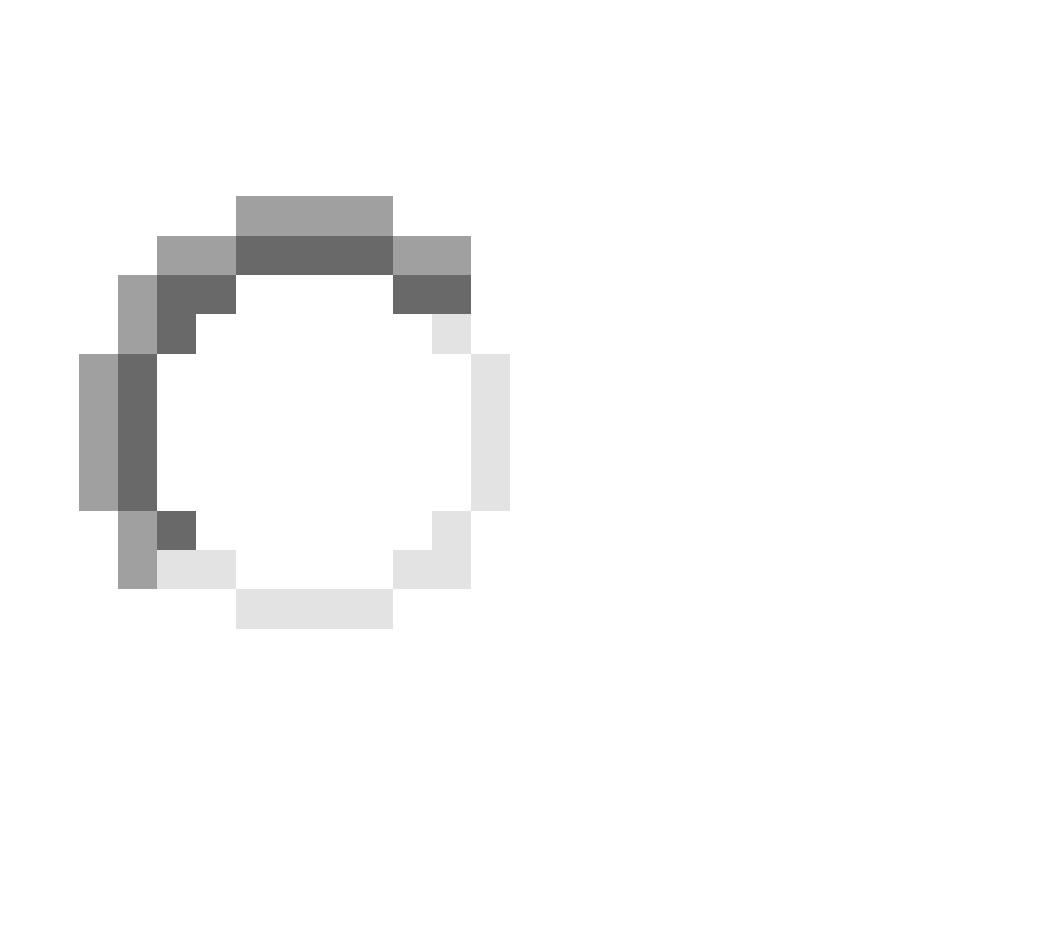
Yes


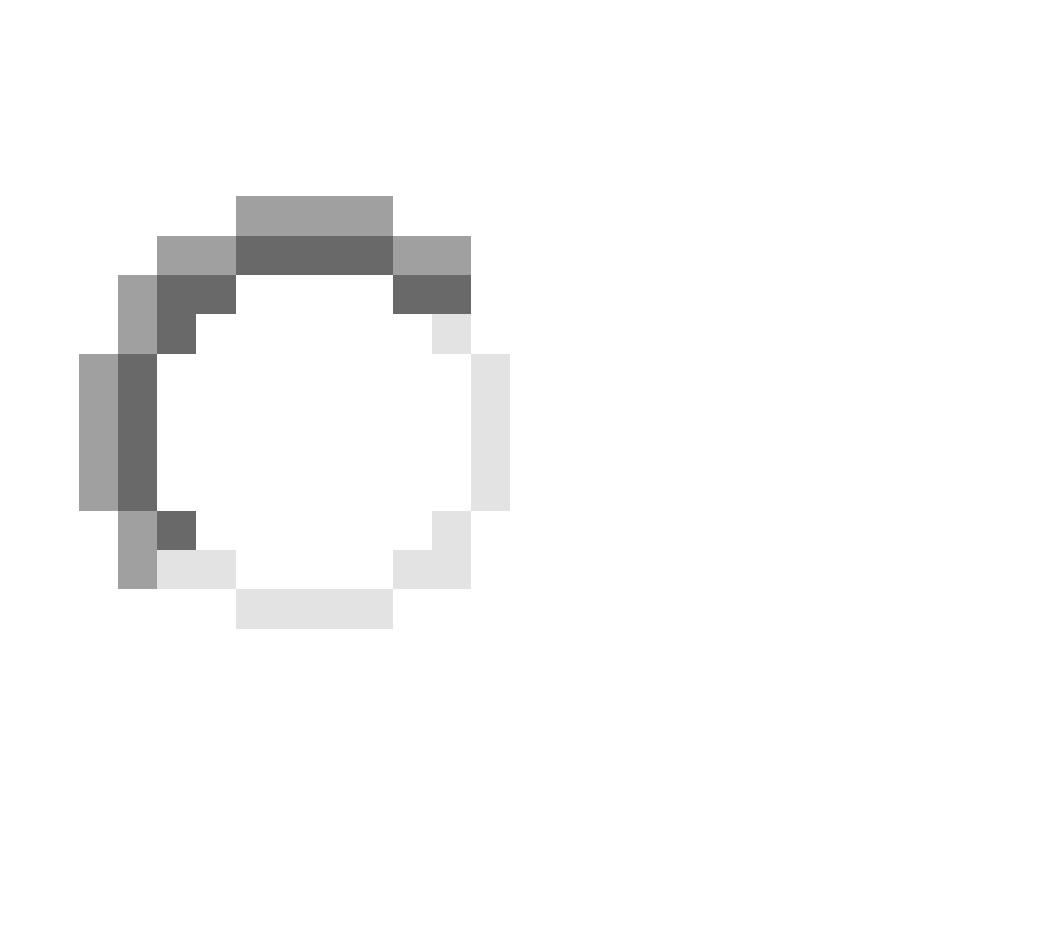
No

17. Are PN like this engaging?


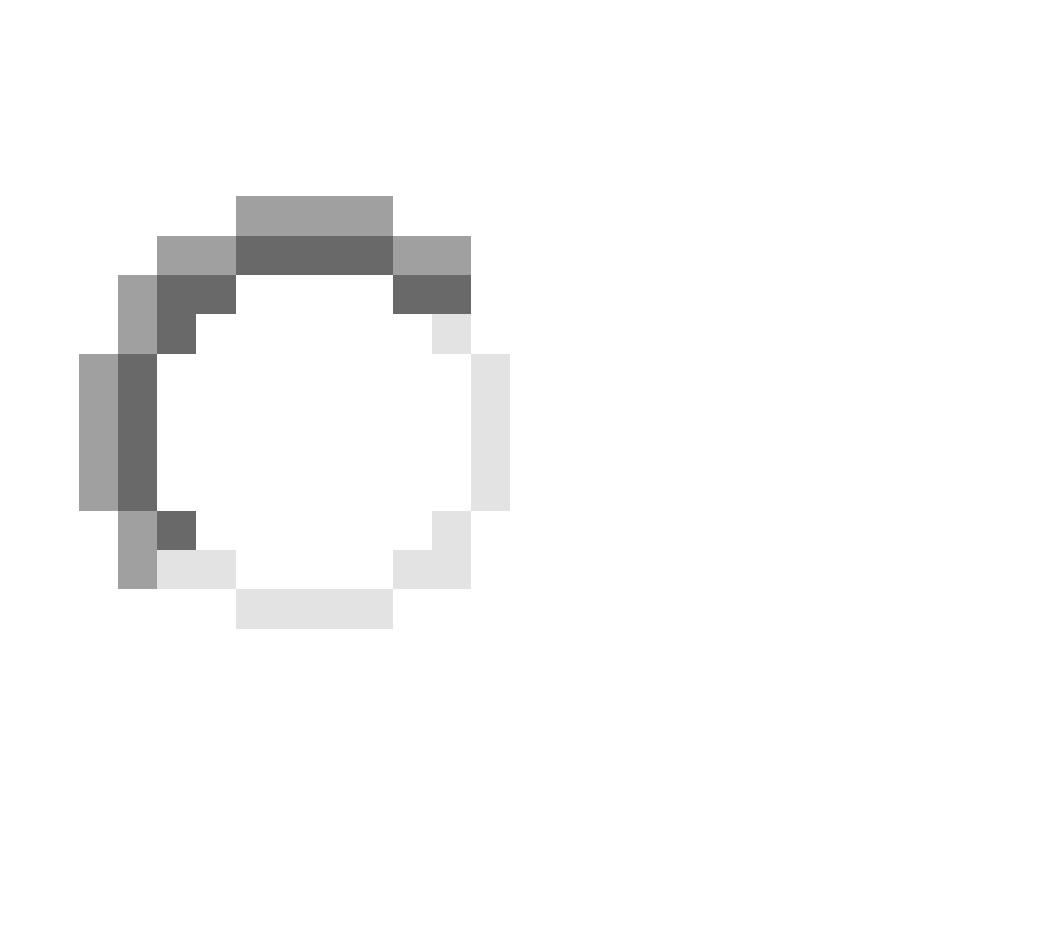
Yes


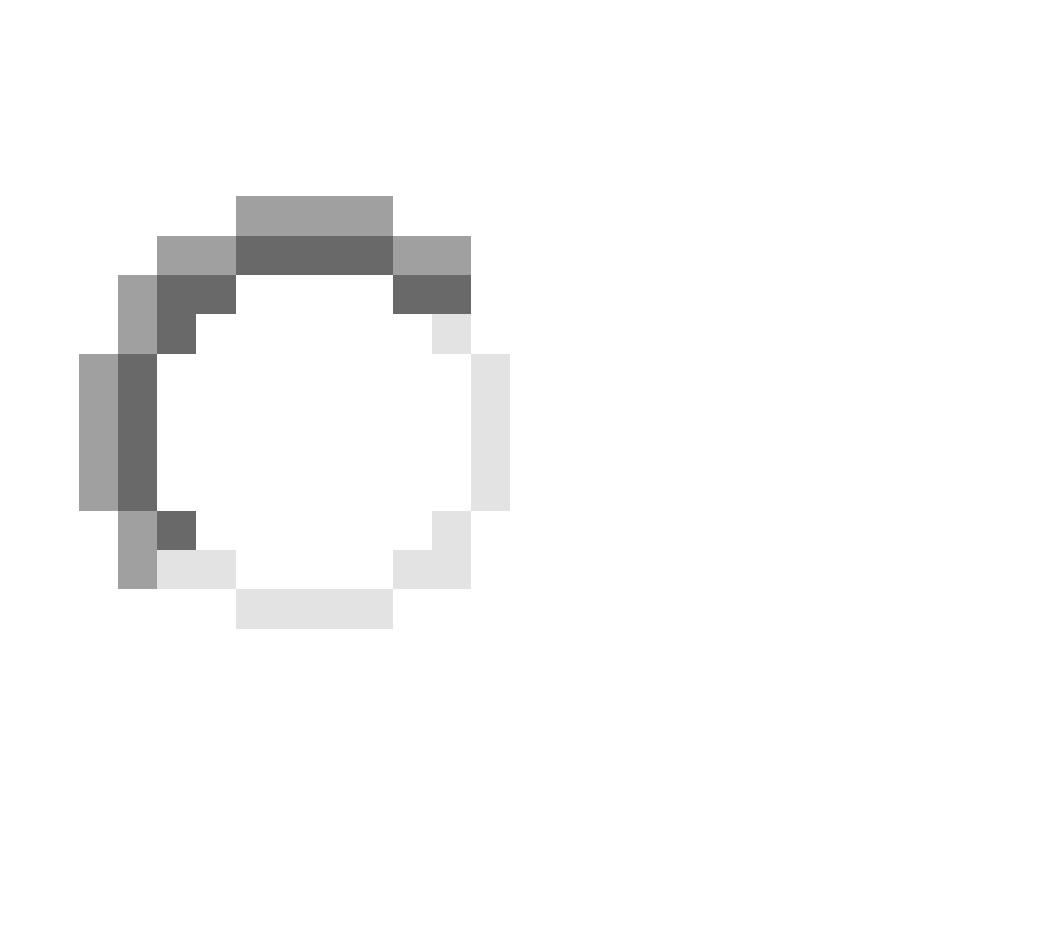
No

18. Do you feel PN like this can improve memory and recall?
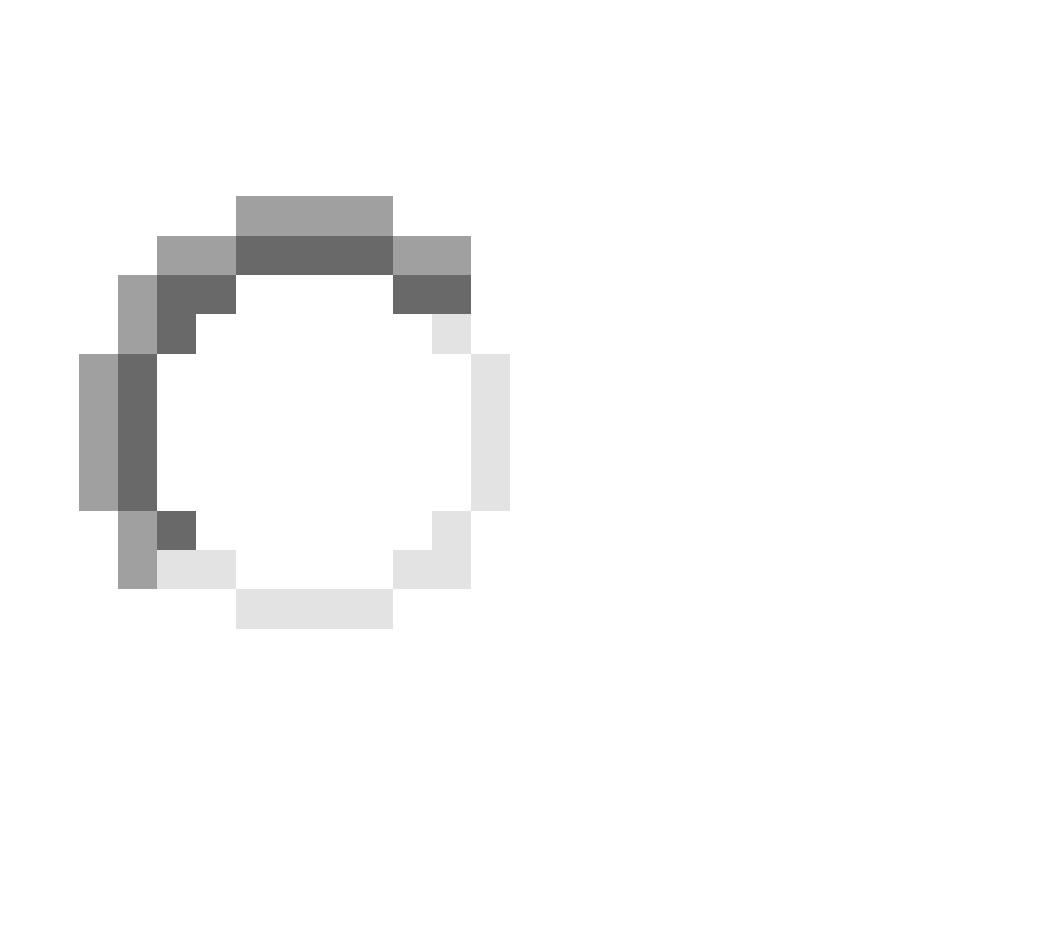
Yes


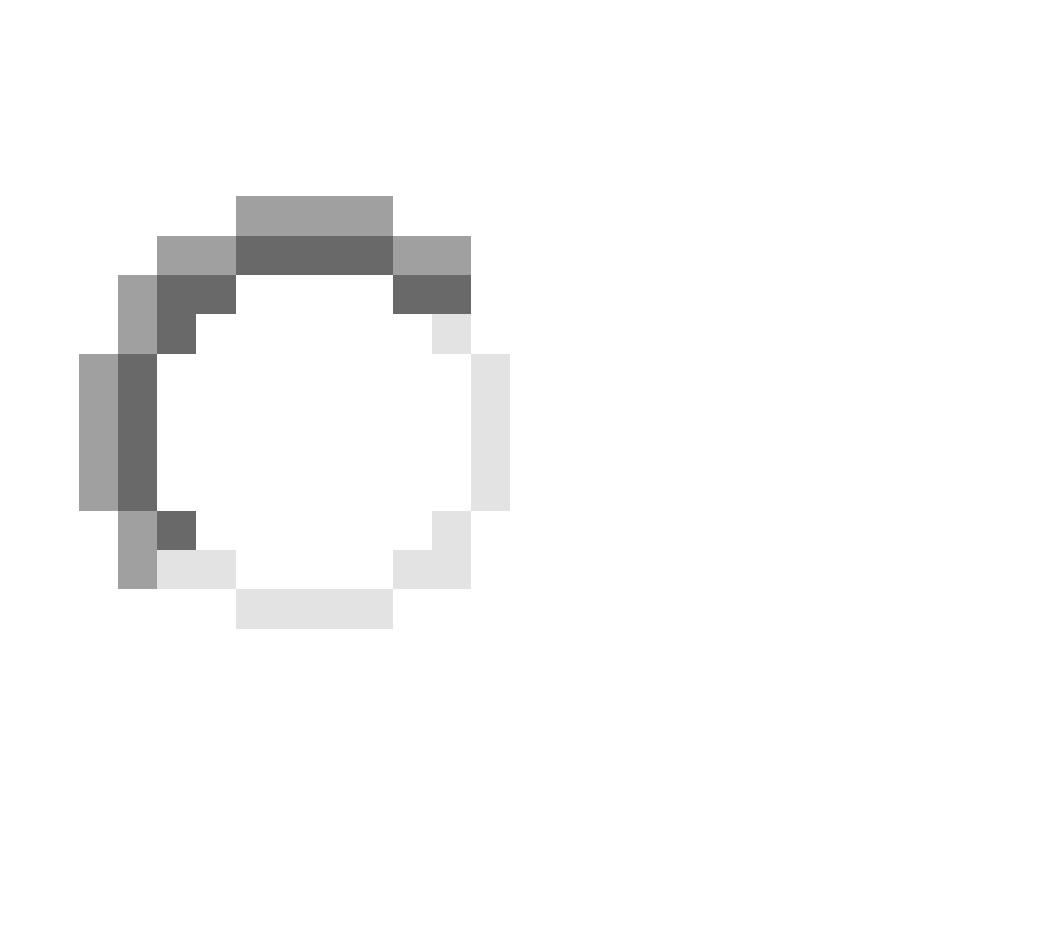
No

19. Do you feel PN like this can improve communication?


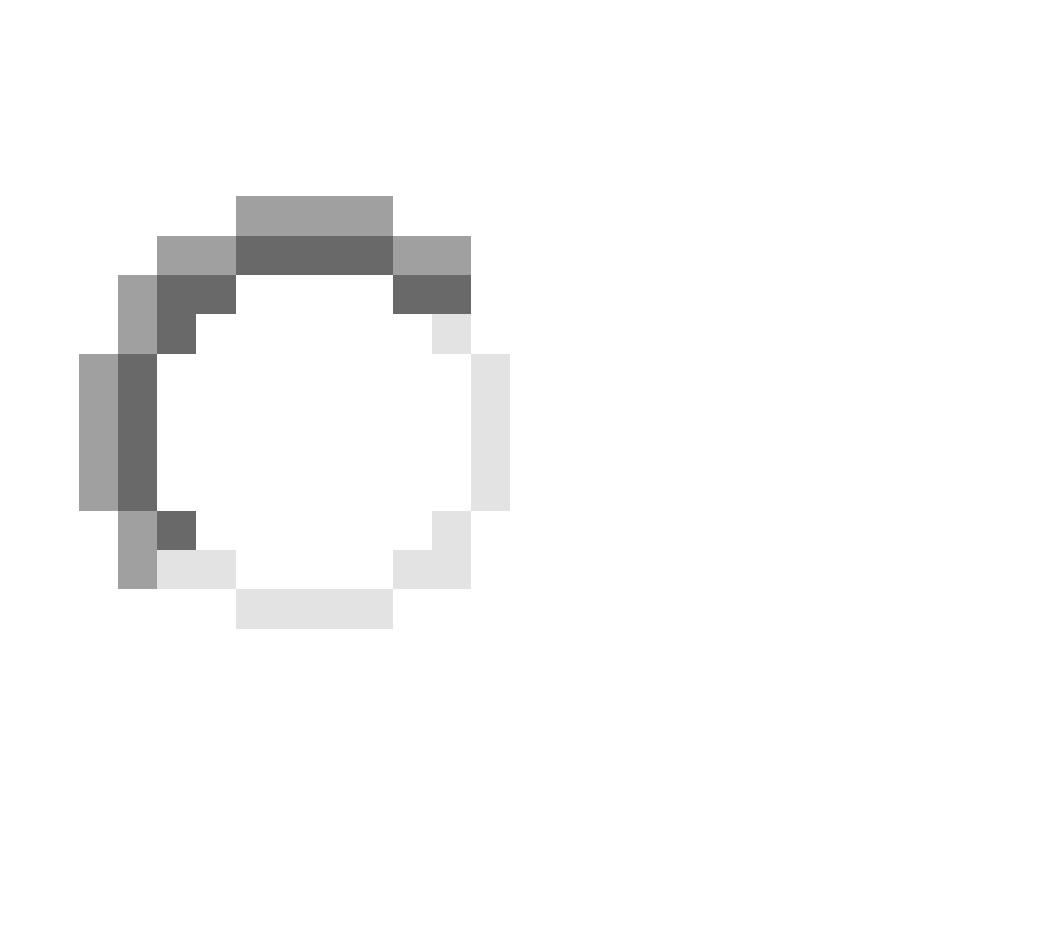
Yes


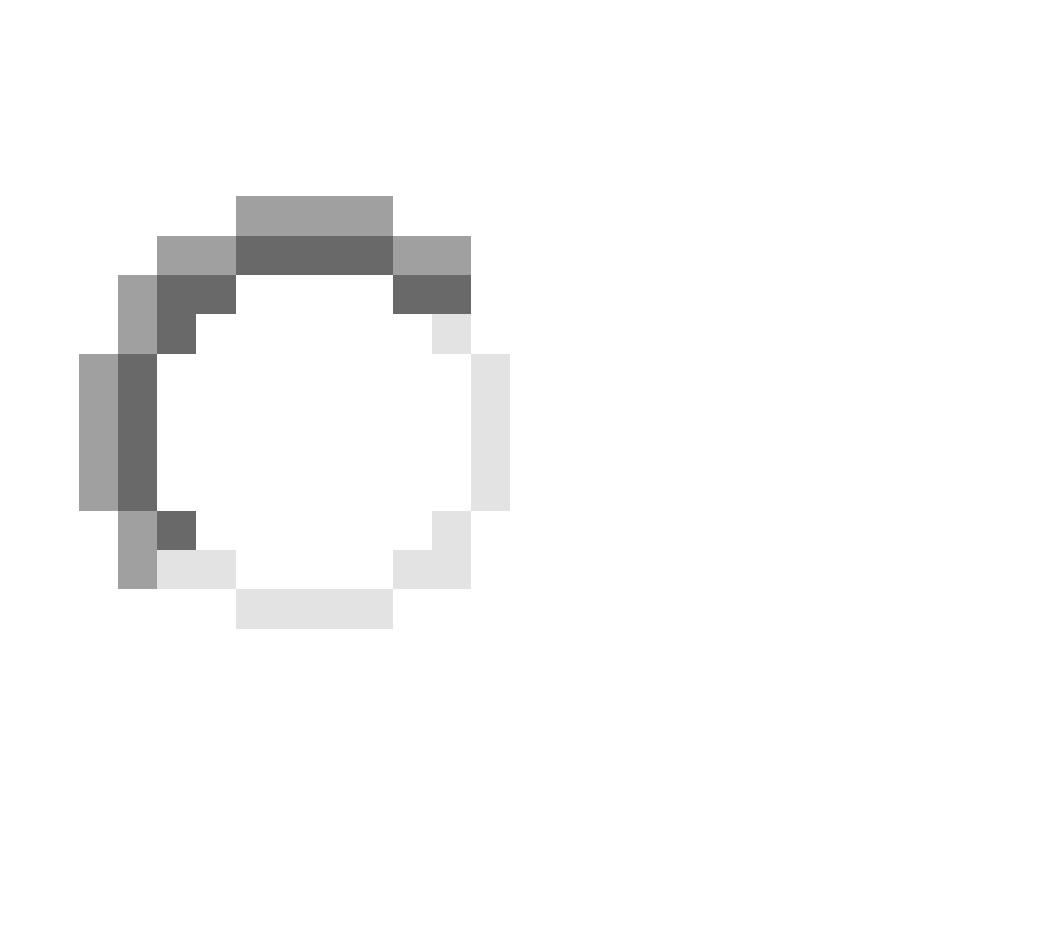
No

20. Do you feel PN like this increase empathy?


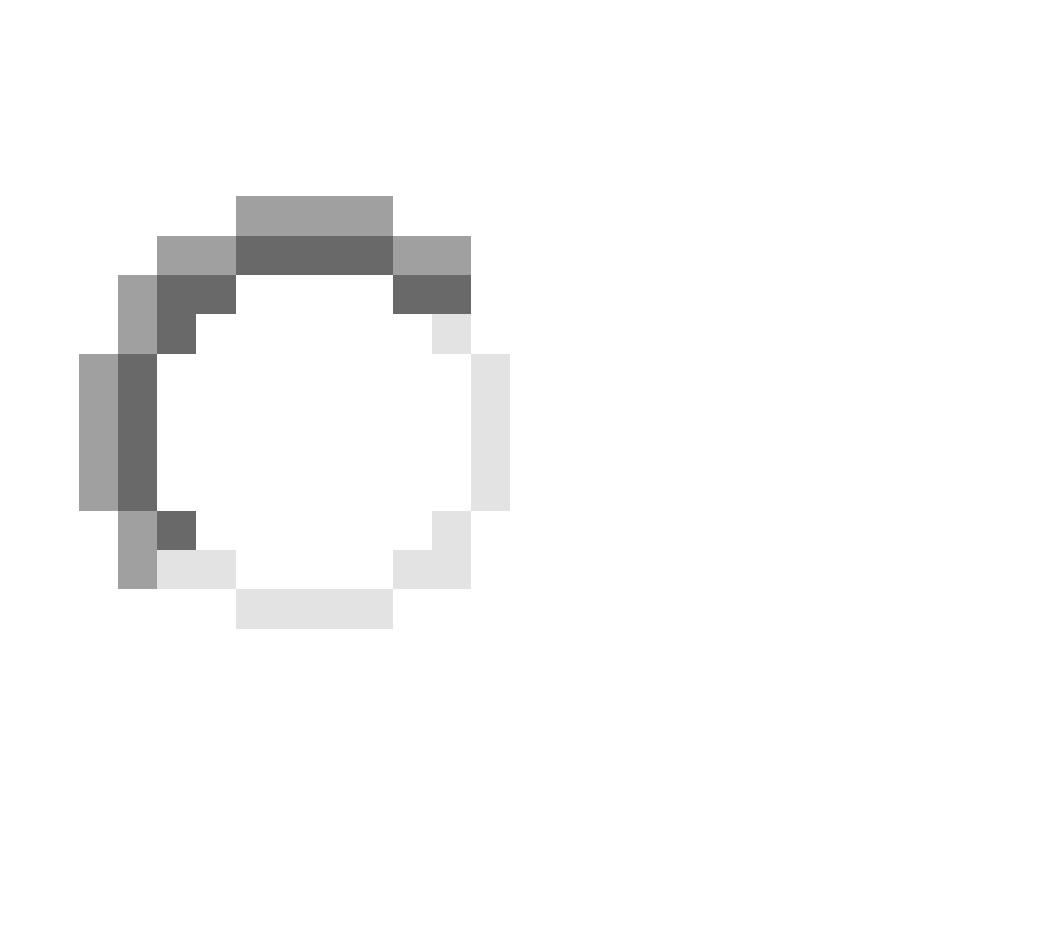
Yes


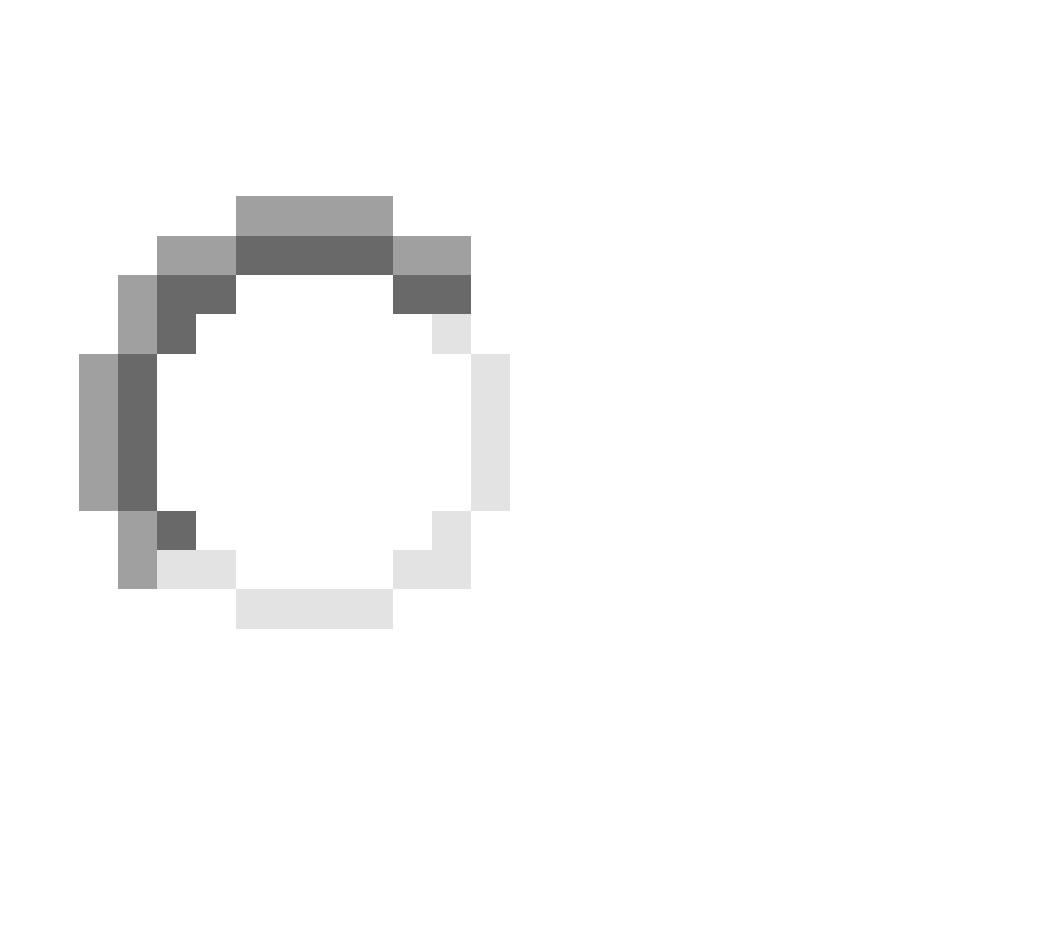
No

21. Do you feel PN like this increase reflective thinking?


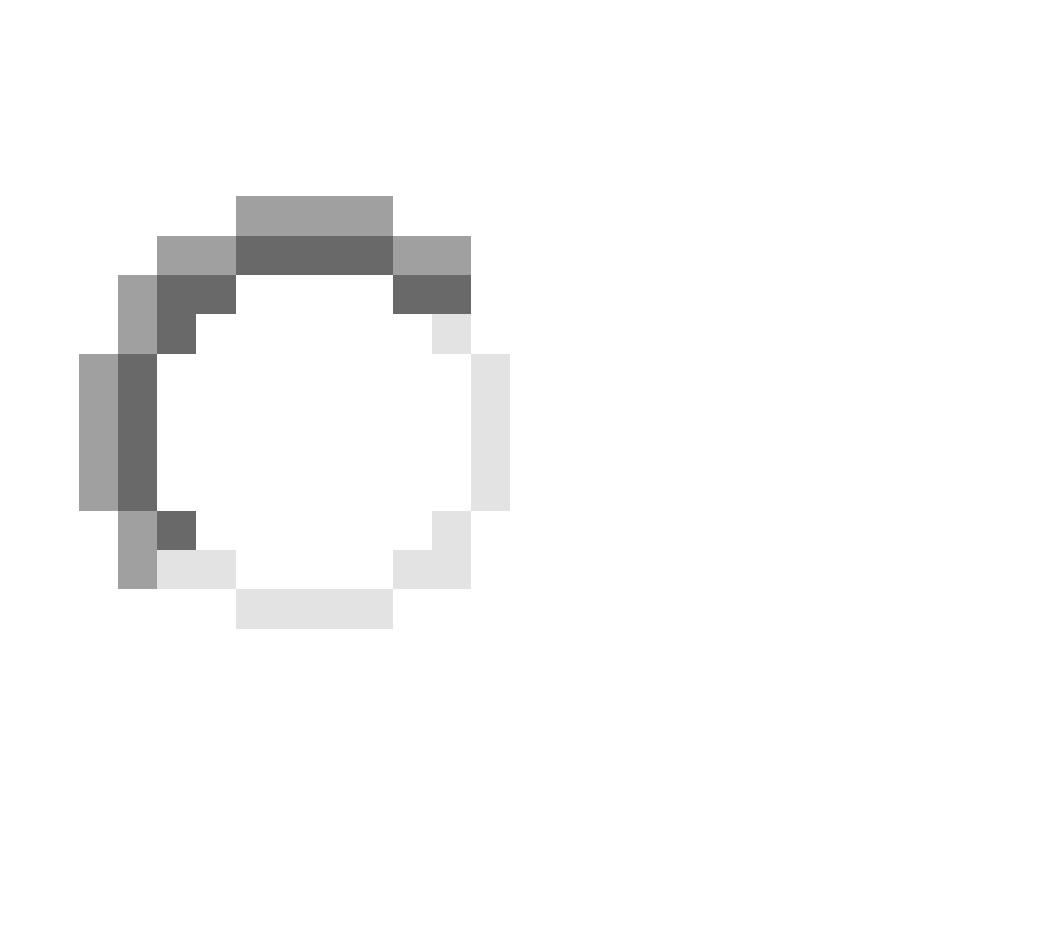
Yes


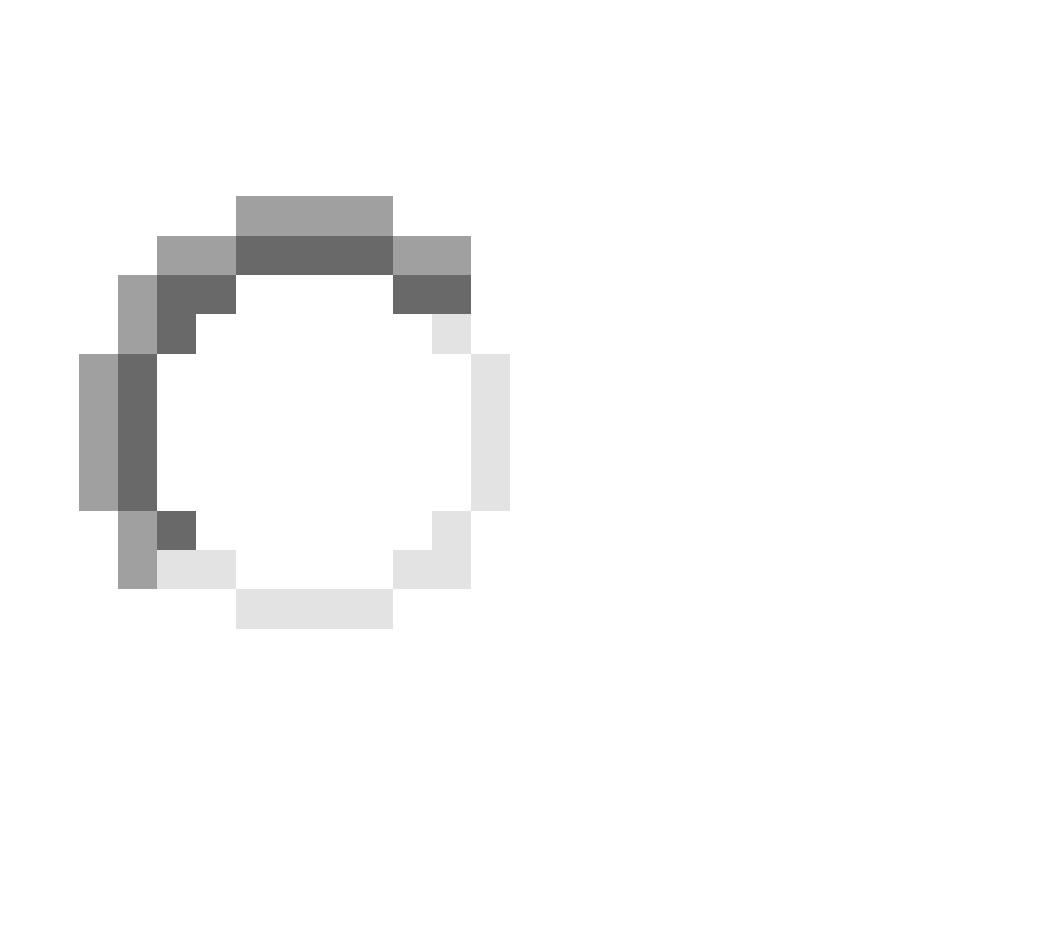
No

22. Would you use WB like this as a revision tool for clinical ophthalmology?


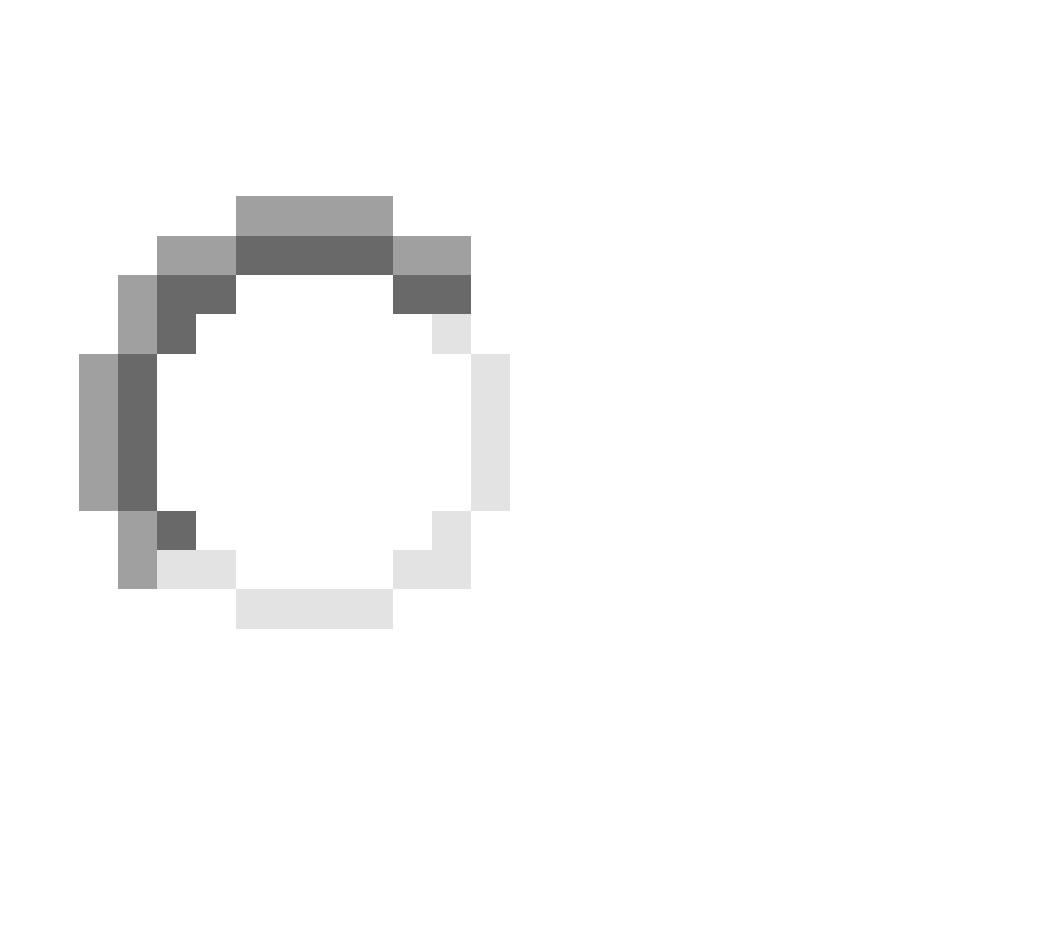
Yes


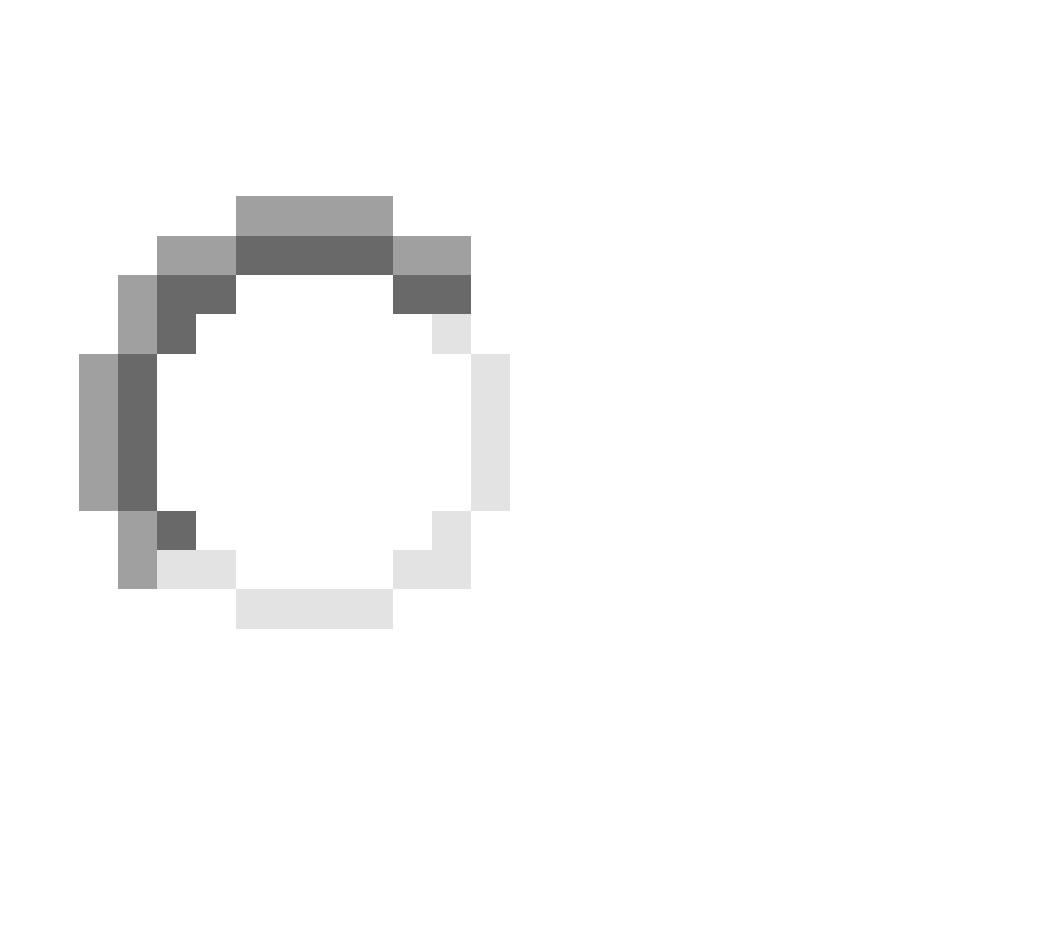
No

23. Would you recommend WB like this to other students to learn clinical ophthalmology?


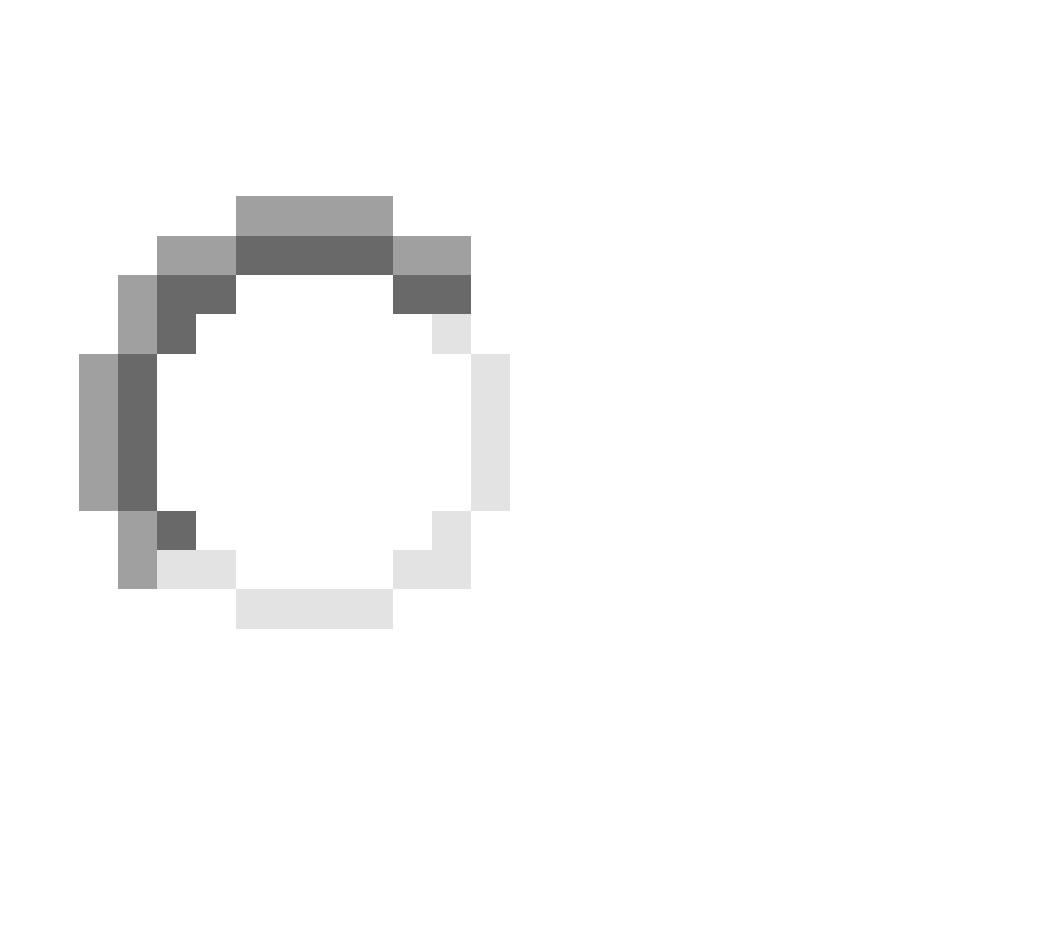
Yes


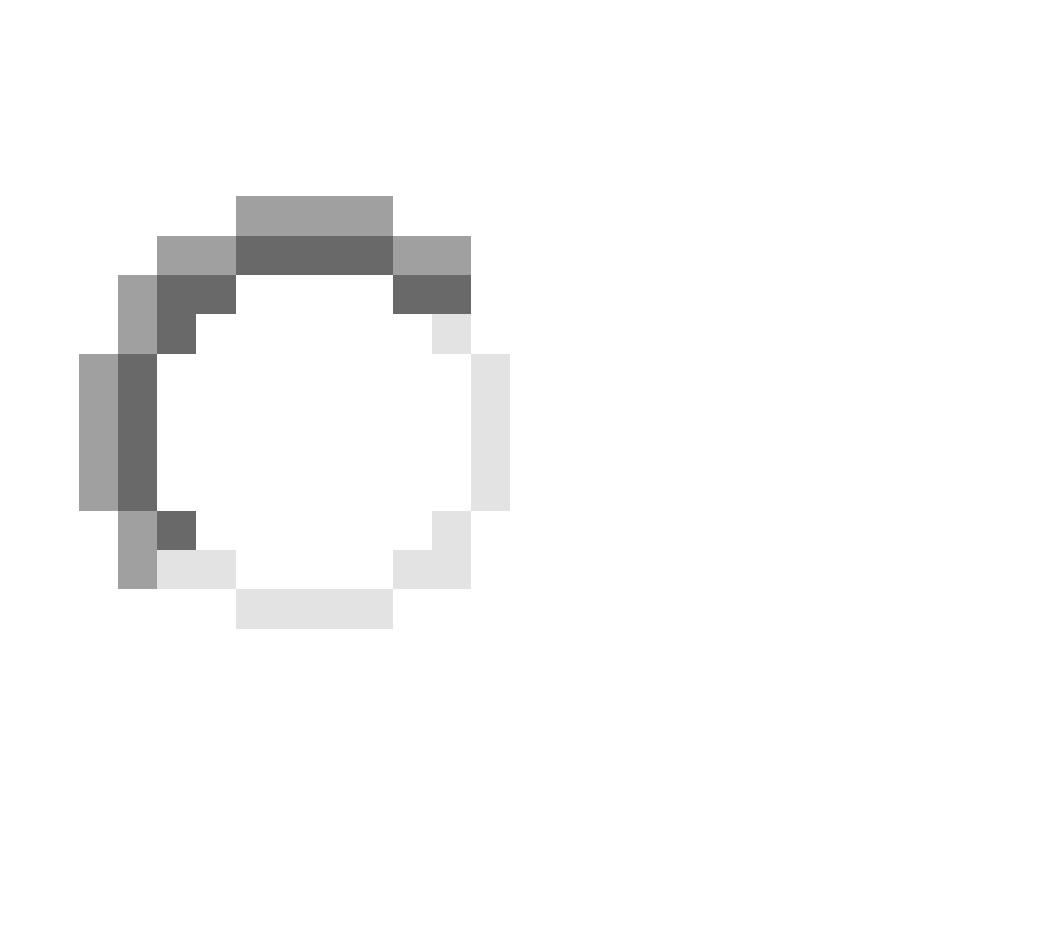
No

24. The WB was of adequate and of appropriate length?


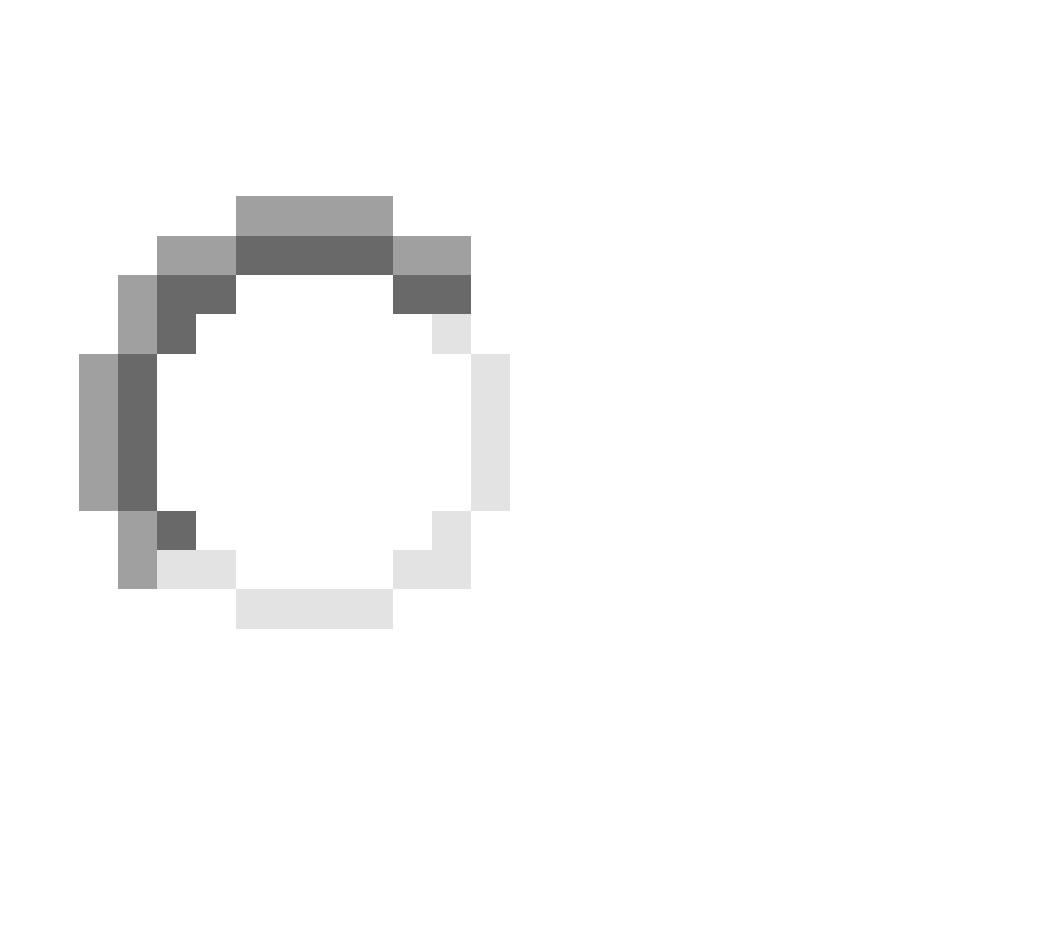
Yes


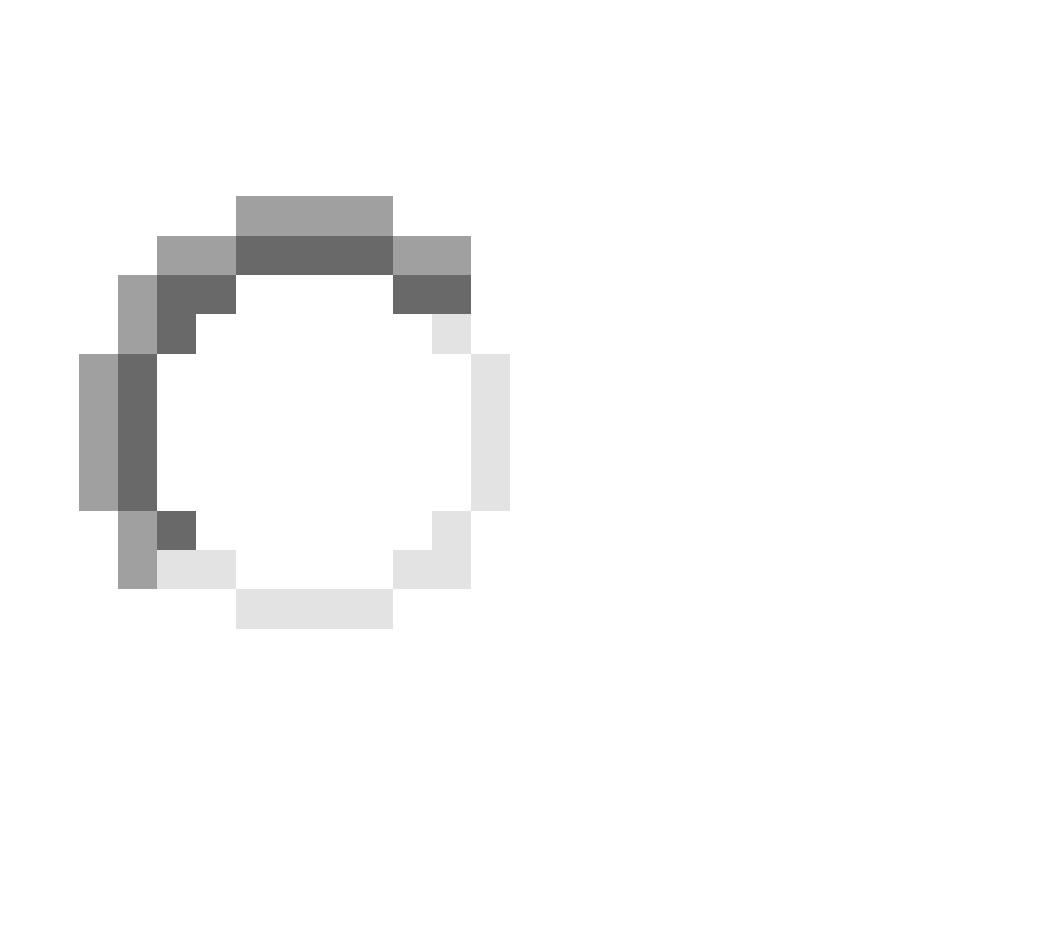
No

25. Would you use PN like this as a revision tool for clinical ophthalmology?


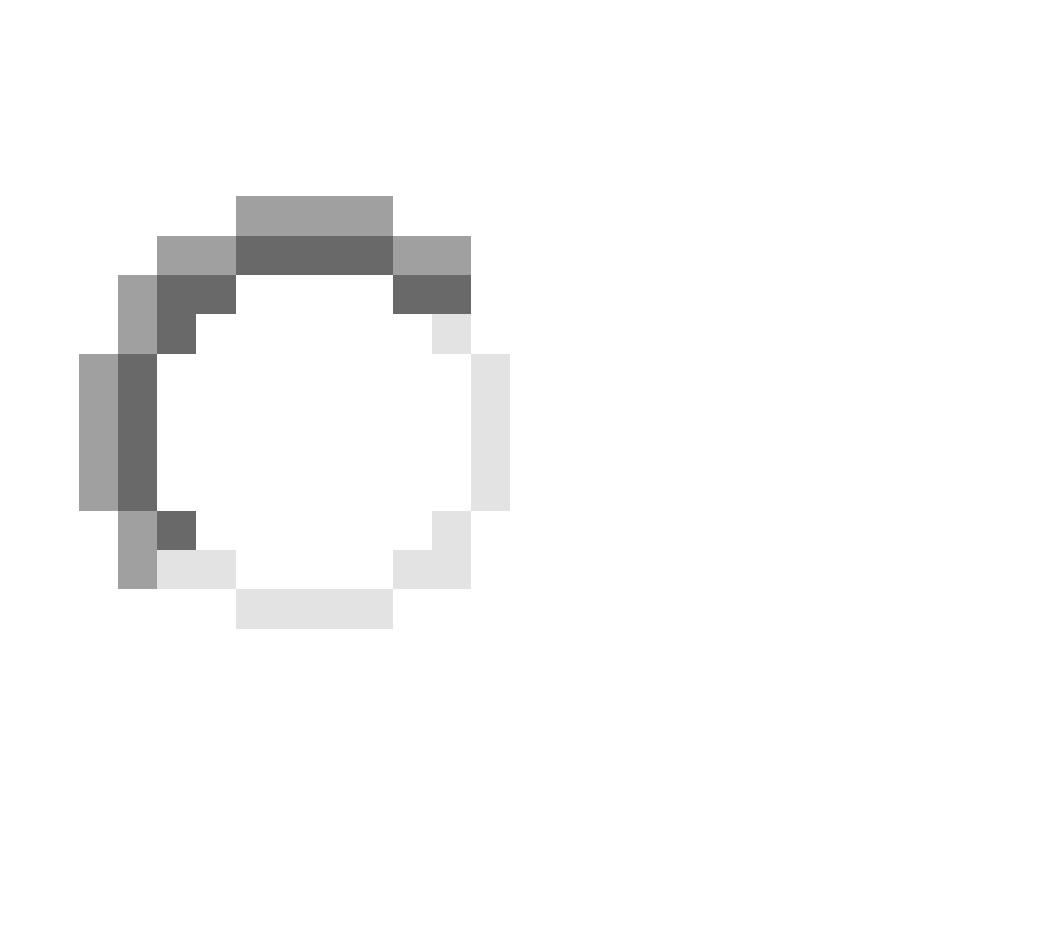
Yes


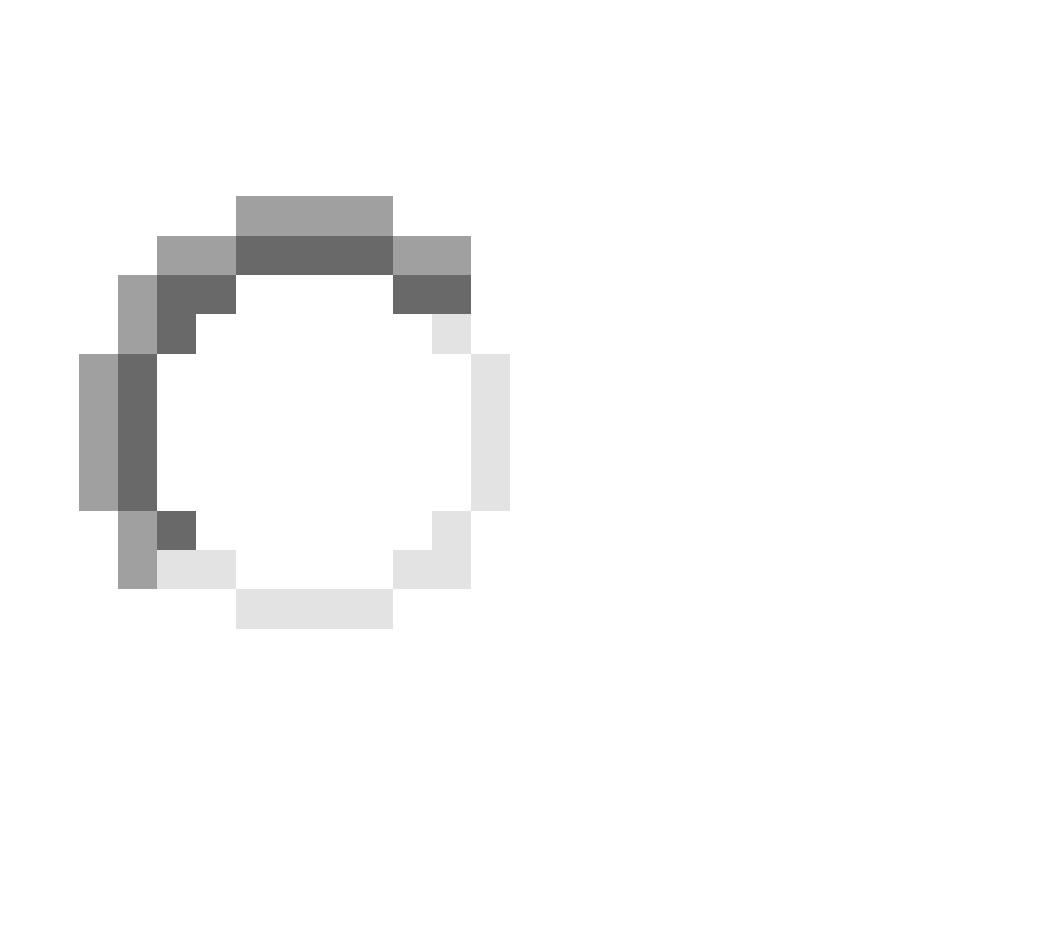
No

26. Would you recommend PN like this to other students to learn clinical ophthalmology?


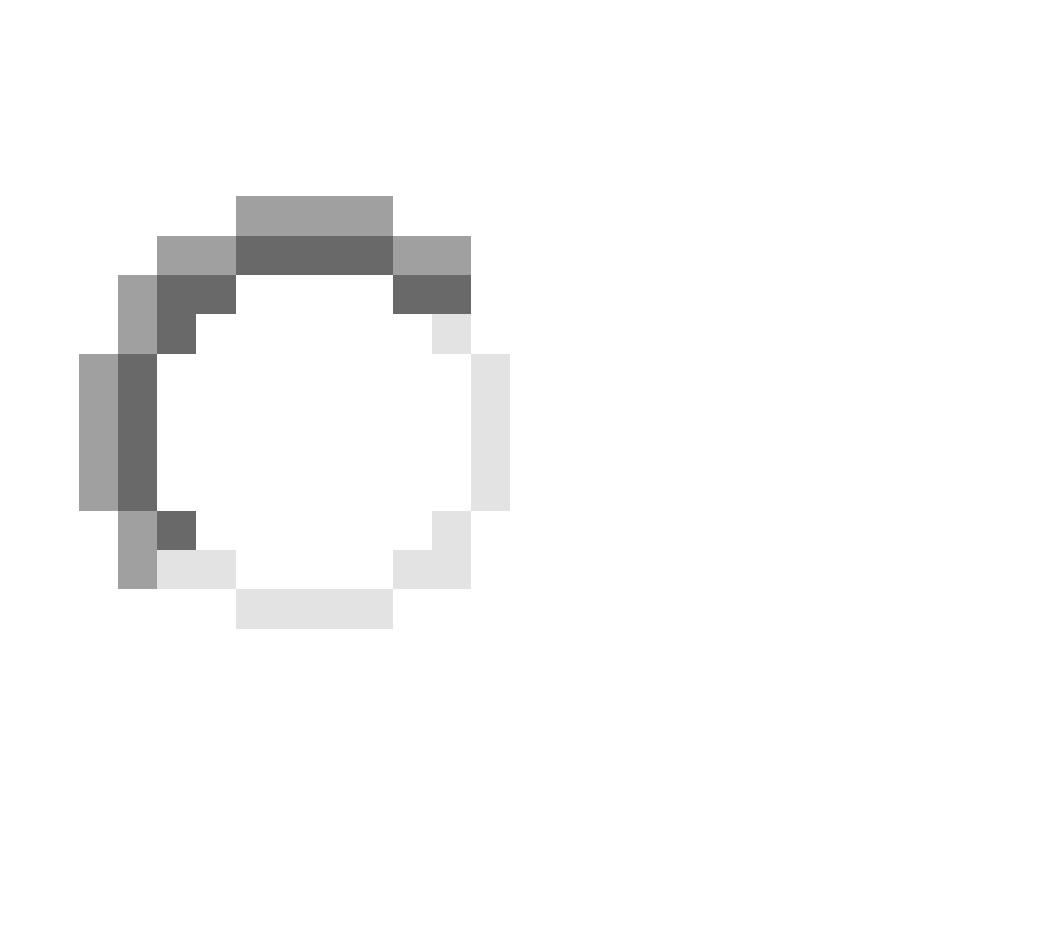
Yes


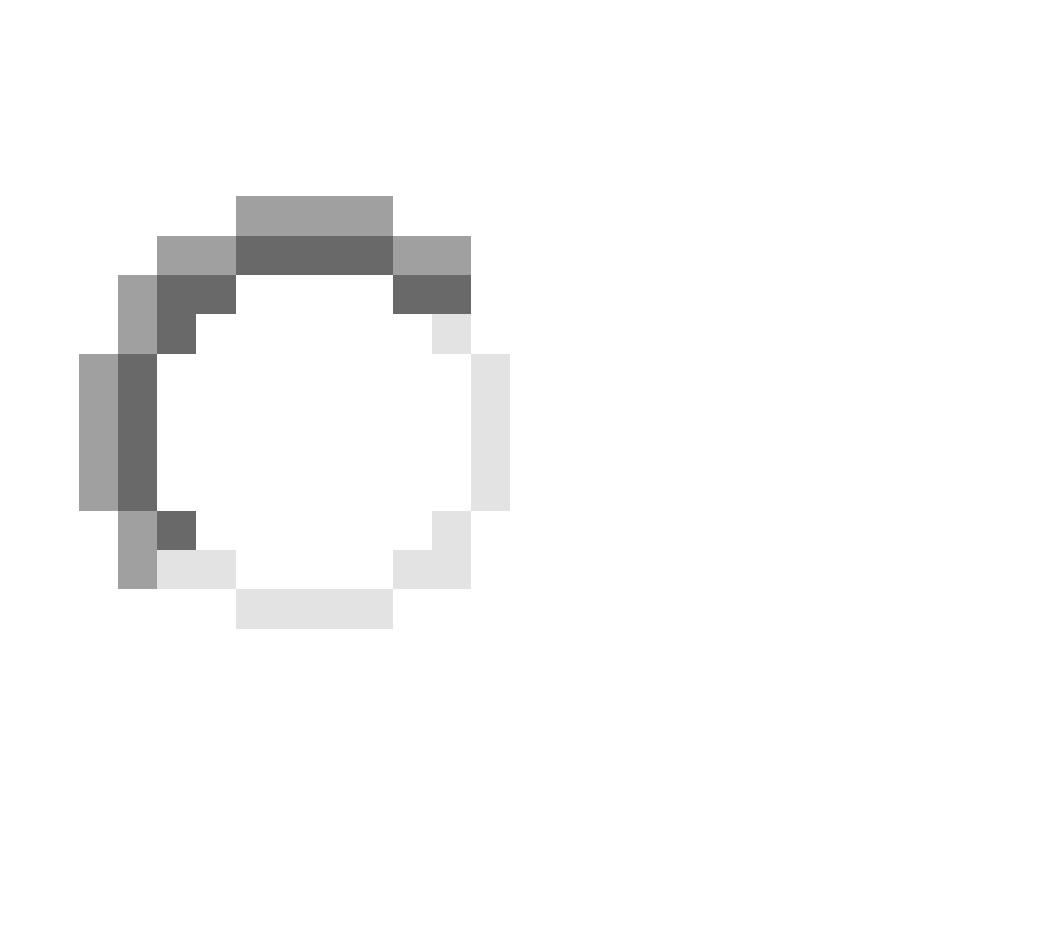
No

27. The PN was of adequate and of appropriate length?


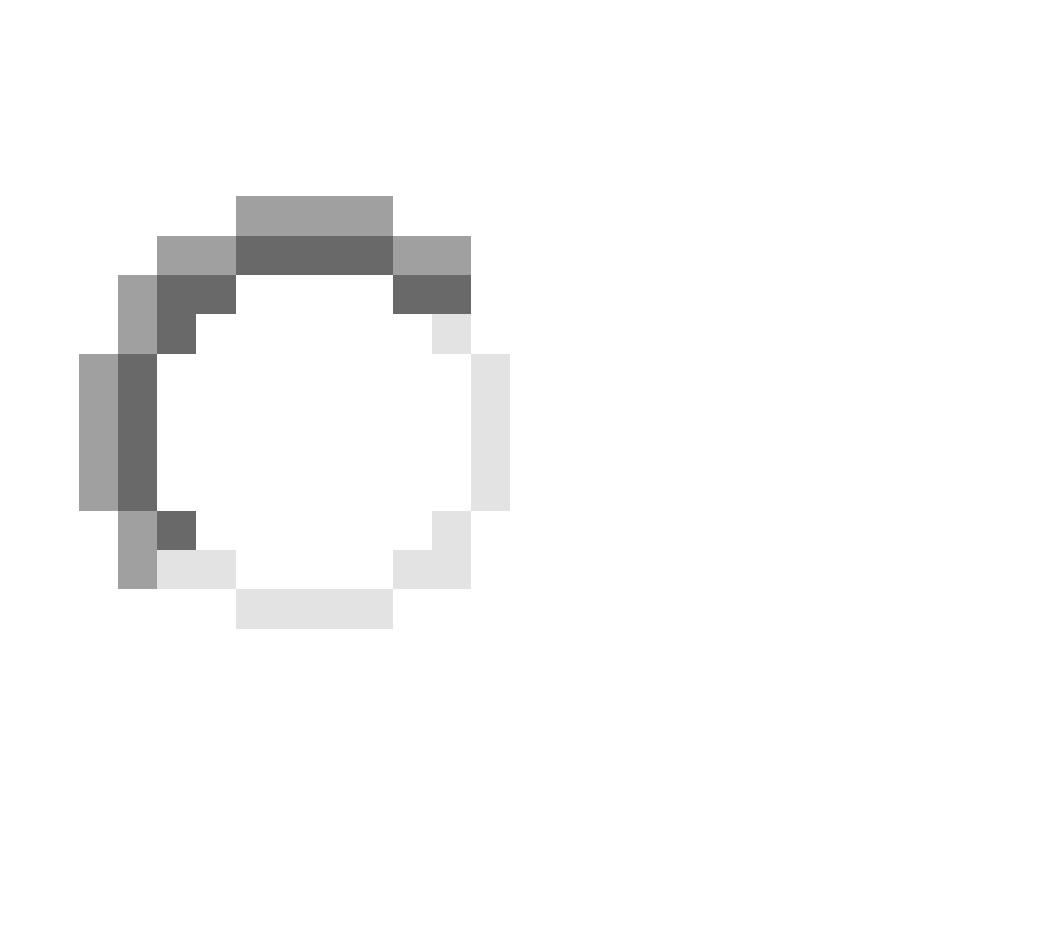
Yes


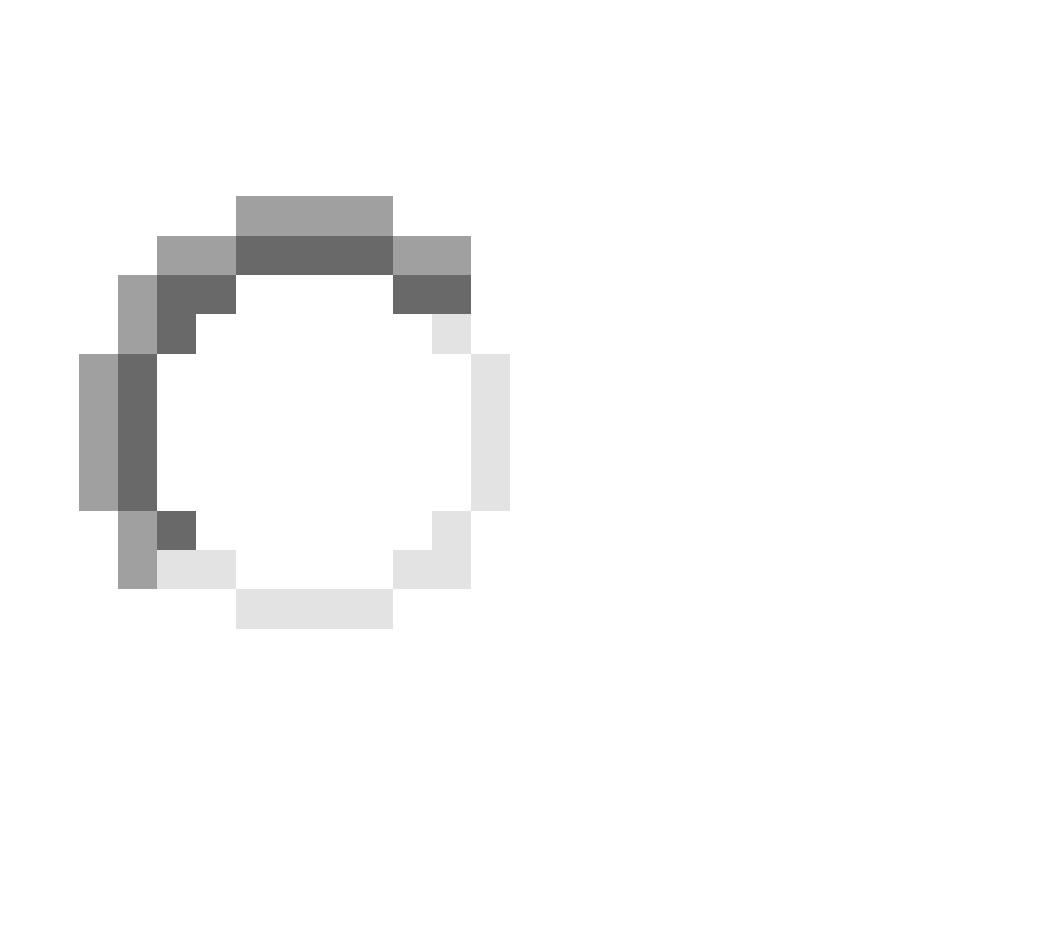
No

**Supplementary Table 1** Medical students perceived qualities of WB for learning ophthalmology and satisfaction in relation to gender and level of study.

| Question | Positive Answers (%) | M | F | *P* value | Early Clinical Year (4th UG and 3rd PG) | Late Clinical Year (5th, 6th UG and 4th PG) | *P* value | UG | PG | *P* value |
| --- | --- | --- | --- | --- | --- | --- | --- | --- | --- | --- |
| Is WB animation like this engaging? | 106 (88) | 40 (80) | 66 (93) | **0.03** | 28 (88) | 78 (88) | 0.98 | 62 (89) | 44 (86) | 0.71 |
| Do you feel WB like this help with understanding? | 101 (83) | 38 (76) | 63 (89) | 0.1 | 26 (81) | 75 (84) | 0.68 | 57 (81) | 44 (86) | 0.21 |
| Do you feel WB like this help with memory and recall? | 100 (83) | 39 (78) | 61 (86) | 0.26 | 27 (84) | 73 (82) | 0.76 | 56 (80) | 44 (86) | 0.37 |
| Would you use WB like this as a revision tool for clinical ophthalmology? | 102 (84) | 40 (80) | 62 (87) | 0.28 | 26 (81) | 76 (85) | 0.58 | 56 (80) | 46 (90) | 0.13 |
| Would you recommend WB like this to other students for clinical ophthalmology learning? | 104 (86) | 41 (82) | 63 (89) | 0.29 | 26 (81) | 78 (88) | 0.37 | 58 (83) | 46 (90) | 0.25 |

M: males; F: females; WB: whiteboard animation Videos; UG: under-graduate; PG: post-graduate; **Bold**: statistically significant results

**Supplementary Table 2** Medical students perceived qualities of PN for learning ophthalmology and satisfaction in relation to gender and level of study.

| Question | Positive Answers (%) | M | F | *P* value | Early Clinical Years (4th UG and 3rd PG) | Late Clinical Years (5th, 6th UG and 4th PG) | *P* value | UG | PG | *P* value |
| --- | --- | --- | --- | --- | --- | --- | --- | --- | --- | --- |
| Are PN like this engaging? | 99 (82) | 40 (80) | 59 (83) | 0.66 | 23 (72) | 76 (85) | 0.09 | 57 (81) | 42 (82) | 0.90 |
| Do you feel PN like this can improve memory and recall? | 92 (76) | 40 (80) | 52 (73) | 0.39 | 23 (72) | 69 (78) | 0.52 | 57 (81) | 35 (69) | 0.1 |
| Do you feel PN like this can improve communication? | 85 (70) | 35 (70) | 50 (70) | 0.96 | 22 (69) | 63 (71) | 0.83 | 49 (70) | 36 (71) | 0.94 |
| Do you feel PN like this increases empathy? | 93 (77) | 36 (72) | 57 (80) | 0.29 | 24 (75) | 69 (78) | 0.77 | 51 (73) | 42 (82) | 0.22 |
| Do you feel PN like this increases reflective thinking? | 103 (85) | 43 (86) | 60 (85) | 0.82 | 29 (91) | 74 (83) | 0.31 | 57 (81) | 46 (90) | 0.18 |
| Would you use PN like this as a revision tool for clinical ophthalmology? | 49 (41) | 21 (42) | 28 (39) | 0.78 | 16 (50) | 33 (37) | 0.20 | 27 (39) | 22 (43) | 0.61 |
| Would you recommend PN like this to other students for clinical ophthalmology learning? | 108 (89) | 44 (88) | 64 (90) | 0.71 | 26 (81) | 82 (92) | 0.09 | 63 (90) | 45 (88) | 0.76 |

M: males; F: females; PN: patient narratives; UG: under-graduate; PG: post-graduate
